# Supplementary material for: The Critical Role of Aqueous-Phase Processes in Aromatic-Derived Nitrogen-Containing Organic Aerosol Formation in Cities with Different Energy Consumption Patterns
Source: Copernicus journal article supplement (doi:10.5194/egusphere-2024-2602), 2024-10-07
Supplement: Supplementary file 1 [file egusphere-2024-2602-supplement.pdf]

*Supplement of*

**The Critical Role of Aqueous-Phase Processes in  
Aromatic-Derived Nitrogen-Containing Organic  
Aerosol Formation in Cities with Different  
Energy Consumption Patterns**

**Yi-Jia Ma, et al.**

*Correspondence to:* Yu Xu (xuyu360@sjtu.edu.cn)

## **Table of Contents**

|                      |         |
|----------------------|---------|
| Sect. S1–Sect. S3    | Page 3  |
| Table S1–Table S13   | Page 10 |
| Figure S1–Figure S14 | Page 39 |

## Sect. S1. Parameter calculation and compound classification

The concentrations of  $\text{Cl}^-$  and  $\text{K}^+$  derived from non-sea-salt (nss) sources were estimated by the following equation (Ni et al., 2013).

$$N_{\text{ss-x}} = [x] - [\text{Na}^+] \times a \quad (1)$$

where the symbol  $[x]$  indicates the concentrations of  $\text{Cl}^-$  and  $\text{K}^+$ . The symbol  $a$  represents the typical ratio of the corresponding species to  $\text{Na}^+$  in sea water ( $[\text{Cl}^-]/[\text{Na}^+] = 1.80$  and  $[\text{K}^+]/[\text{Na}^+] = 0.036$ ).

The value of double-bond equivalent (DBE) can provide information on the number of rings and double bonds in a molecule (Lechtenfeld et al., 2014; Bae et al., 2011). The DBE value of each identified molecular formula was calculated as follows.

$$\text{DBE} = (2N_C + 2 - N_H + N_N) / 2 \quad (2)$$

where the  $N_C$ ,  $N_H$ , and  $N_N$  represent the number of C, H, and N atoms in a molecule, respectively.

The carbon oxidation state ( $\text{OS}_C$ ) can be regarded as an important indicator to evaluate the composition evolution of organic compounds that underwent oxidation processes (Kroll et al., 2011), which was calculated as follows.

$$\text{OS}_C \approx 2 \times N_O / N_C - N_H / N_C \quad (3)$$

where the  $N_C$ ,  $N_H$ , and  $N_O$  represent the number of C, H, and O atoms in a molecule, respectively.

The modified aromaticity index ( $\text{AI}_{\text{mod}}$ ) can be used to improve the identification and characterization of aromatic-like compounds in aerosol organic (Xu et al., 2023; Zhong et al., 2023). The  $\text{AI}_{\text{mod}}$  value was calculated as shown below.

$$AI_{\text{mod}} = (1 + N_C - 0.5 \times N_O - N_S - 0.5 \times N_N - 0.5 \times N_H) / (N_C - 0.5 \times N_O - N_S - N_N) \quad (4)$$

where the  $N_C$ ,  $N_H$ ,  $N_O$ ,  $N_N$  and  $N_S$  correspond to the number of C, H, O, N, and S atoms in a molecular formula, respectively.

The van Krevelen diagrams and  $AI_{\text{mod}}$  values have been suggested to further classify organic compounds categories, (Xu et al., 2023; Su et al., 2021; Seidel et al., 2014) according to which the identified subgroups included saturated-like molecules (Sa,  $H/C \geq 2.0$ ), unsaturated aliphatic-like molecules (UA,  $1.5 \leq H/C < 2.0$ ), highly unsaturated-like molecules (HU,  $AI_{\text{mod}} \leq 0.5$  and  $H/C < 1.5$ ), highly aromatic-like molecules (HA,  $0.5 < AI_{\text{mod}} \leq 0.66$ ), and (E) polycyclic aromatic-like molecules (PA,  $AI_{\text{mod}} > 0.66$ ).

The aromaticity equivalent ( $X_C$ ), a modified index for aromatic compounds, was calculated using the following equation:

$$X_C = [3 \times (\text{DBE} - (p \times o + p \times s)) - 2] / [\text{DBE} - (p \times o + p \times s)] \quad (5)$$

where DBE represents the double bond equivalence.  $p$  and  $q$  are the fractions of oxygen and sulfur atoms, respectively, which are involved in the  $\pi$ -bond structure of the compound. In this study,  $p = q = 1$  was applied for compounds detected in ESI+ and  $p = q = 0.5$  was applied for compounds detected in ESI- (Wang et al., 2021). The thresholds of  $X_C \geq 2.50$  and  $X_C \geq 2.71$  were used to identify monoaromatic and polyaromatic compounds, respectively (Yassine et al., 2014).

Many previous studies on organic aerosol molecular composition have utilized the peak intensity of species to highlight the relative abundance of specific compound groups (Wang et al., 2021; Song et al., 2018; Zou et al., 2023). However, it should be

noted that different organic compounds may exhibit varying signal responses in the mass spectrometer because of their differences in ionization and transmission efficiencies (Schmidt et al., 2006; Krueve et al., 2014; Leito et al., 2008). Here, an intercomparison (mainly compared among samples within this study) of compound relative abundance was conducted without consideration the differentiation of ionization efficiency, as indicated by many previous studies (Song et al., 2018; Wang et al., 2021; Zou et al., 2023). Furthermore, the peak intensity-weighted average molecular mass (MM), elemental ratios, DBE,  $X_C$ ,  $AI_{mod}$ , and  $OS_C$  for the molecular formula  $C_cH_hO_oN_n$  were calculated using the following equations, respectively:

$$MM_w = \sum (MM_i \times A_i) / \sum A_i \quad (6)$$

$$O/C_w = \sum (O/C_i \times A_i) / \sum A_i \quad (7)$$

$$H/C_w = \sum (H/C_i \times A_i) / \sum A_i \quad (8)$$

$$N/C_w = \sum (N/C_i \times A_i) / \sum A_i \quad (9)$$

$$O/N_w = \sum (O/N_i \times A_i) / \sum A_i \quad (10)$$

$$DBE_w = \sum (DEB_i \times A_i) / \sum A_i \quad (11)$$

$$X_{Cw} = \sum (X_{Ci} \times A_i) / \sum A_i \quad (12)$$

$$AI_{modw} = \sum (AI_{modi} \times A_i) / \sum A_i \quad (13)$$

$$OS_{Cw} = \sum (OS_{Ci} \times A_i) / \sum A_i \quad (14)$$

where  $A_i$  is the peak signal intensity for each individual compound  $i$ .

## **Sect. S2. The improved classification method for identifying precursors of NOCs**

The identification of the precursors of aerosol NOCs is challenging due to their complex sources and variable atmospheric processes. Recent studies have identified the potential precursors of organic compounds in aerosols based on established atmospheric reactions (Nie et al., 2022; Guo et al., 2022b). Jiang et al. (2023) further refined this classification for CHON<sup>-</sup> compounds in the ambient aerosols. Furthermore, we have improved this identification process to classify Re-NOC precursors. In this study, the classification of CHON<sup>+</sup> and CHON<sup>-</sup> compounds were refined into following categories, including aliphatics-, heterocyclics-, and aromatics-derived Re-NOCs and isoprene-, monoterpenes-, aliphatics-, and aromatics-derived Ox-NOCs. The specific classification process was shown in **Figure S2**. In particular, the isoprene-CHON and monoterpene-CHON lists obtained from previous field observation and laboratory experiments (Ng et al., 2008; Guo et al., 2022b; Xu et al., 2021b; Zhao et al., 2021; Tian et al., 2023; Wu et al., 2021; Shen et al., 2022; Draper et al., 2015; Pullinen et al., 2020; Guo et al., 2022a; Shen et al., 2021; Xu et al., 2021a; Devault and Ziemann, 2021) were summarized in **Table S2** and **Table S3**, respectively. If the identified molecular formulas were presented in above lists, these species were treated as isoprene-derived CHON and monoterpene-derived CHON compounds directly (Jiang et al., 2023). For CHN<sup>+</sup> compounds, they were classified into aliphatic, monoaromatic, and polyaromatic CHN<sup>+</sup> compound (Wang et al., 2021; Yassine et al., 2014).

### **Sect. S3. Classification of possible aqueous-phase processes NOCs based on precursor-product pairs**

To identify potential aqueous-phase processes for aerosol NOC formation, we screened precursor-product pairs from the identified organic compounds. The identification of such pairs for NOCs has been widely used to infer the potential formation pathways of Ox-NOCs in urban snow, road ambient aerosols, and urban aerosols in China (Su et al., 2021; Xu et al., 2023; Jiang et al., 2023). The main reaction pathways adopted by this precursor-product pairs theory were detailed as follows. It has been suggested that the reactions of alcohols, diols, and hydroxyketones with  $\text{N}_2\text{O}_5$  can contribute to the formation of organic nitrates (Kames et al., 1993) (as indicated in R1).

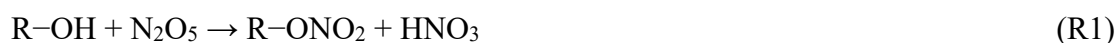

To investigate the potential reaction products or precursors of CHON compounds, we defined R-OH and R-ONO<sub>2</sub> as an oxidation-product pair. This pair was characterized by an elemental difference of -H+NO<sub>2</sub>.

In addition, organic nitrates are likely hydrolyzed to alcohols at different rates of hydrolysis (Boyd et al., 2015; Darer et al., 2011), which could be simplified as follows (R2).

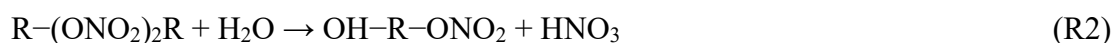

Here, R-(ONO<sub>2</sub>)<sub>2</sub>R and OH-R-ONO<sub>2</sub> were defined a hydrolyzation-product pair, which was characterized by an elemental difference of +H-NO<sub>2</sub>. Furthermore, NOCs may also involve both oxidization and hydrolyzation processes (Su et al., 2021; Jiang et al., 2023), referred as ox\_hy\_N process. The remaining unidentified NOCs were

considered to be from unknown processes, denoted as unknown\_N process (Fig. S5).

The formation pathways of Re-NOCs (mainly CHON+ compounds in this study) can be classified into three main types, including condensation, hydrolyzation, and dehydration processes (Sun et al., 2024). Condensation process (denoted as cond\_N) consists of two types of reactions. One involves the imination reactions (+NH-O) between carbonyl compounds and  $\text{NH}_4^+$  (or  $\text{NH}_3$ ) (R3), resulting in the formation of imines (Lv et al., 2022; Liu et al., 2023a; Wang et al., 2024; Abudumutailifu et al., 2024; Sun et al., 2024; Liu et al., 2023b).

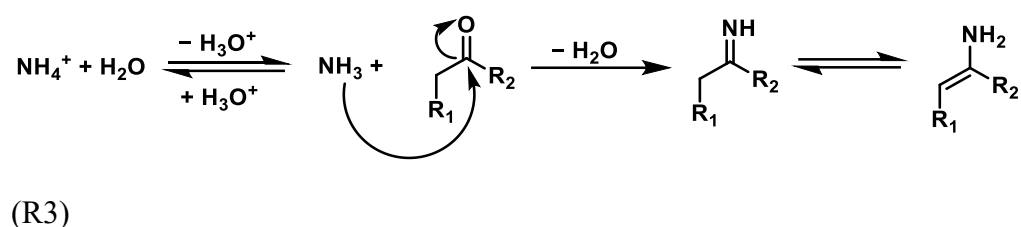

Another reaction pathway involves the intramolecular N-heterocyclic pathway (+N-HO<sub>2</sub>) (R4), which progresses from R3 (Laskin et al., 2010; Laskin et al., 2014; Liu et al., 2023b).

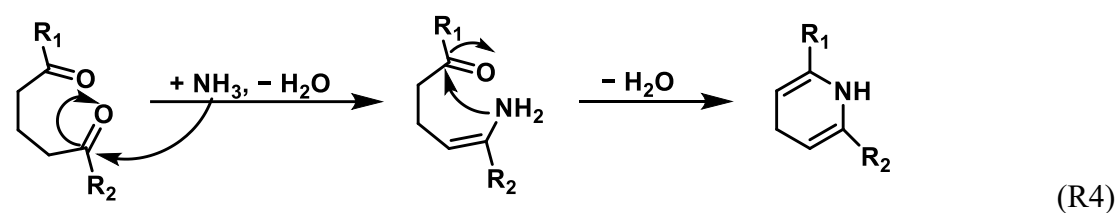

For dehydration processes (denoted as de\_N process), they involve the conversion of NOCs such as amides into nitrile compounds ( $-\text{H}_2\text{O}$ ) (R5) (Simoneit et al., 2003).

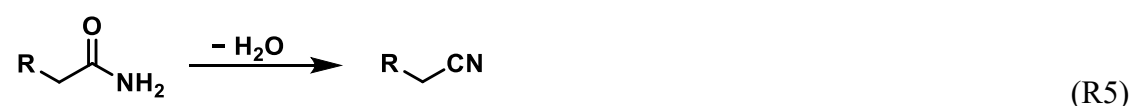

Re-NOCs can also undergo hydrolyzation processes (hy\_N), which is similar to those observed in Ox-NOCs. In addition, the aqueous-phase processes of CHON+ can be



associated with the abovementioned cond\_hy\_N (involving cond\_N and hy\_N), cond\_de\_N (involving cond\_N and de\_N), hy\_de\_N (involving hy\_N and de\_N), and cond\_hy\_de\_N (involving cond\_N, hy\_N and de\_N) formation pathways (**Fig. S4**). Other significant components of Re-NOCs are the CHN<sup>+</sup> compounds. Since CHN<sup>+</sup> compounds lack oxygen atoms, they are unlikely to be formed through hydrolyzation processes. Thus, their potential formation mechanisms include cond\_N, de\_N, cond\_de\_N, and other unidentified (unknown\_N) pathways. The abbreviations, types, and more details for these processes were summarized in **Table S4**. The specific strategies for identifying different formation pathways of NOCs were illustrated in **Figs. S3–S5**.

**Table S1.** The mean values ( $\pm$  SD) of the major parameters observed in different cities in different periods.

| City                                                        | HEB               |                    |                   | BJ                  |                     |                   | HZ                  |                     |                     |               |
|-------------------------------------------------------------|-------------------|--------------------|-------------------|---------------------|---------------------|-------------------|---------------------|---------------------|---------------------|---------------|
|                                                             | Period            | All                | Clean             | Haze                | All                 | Clean             | Haze                | All                 | Clean               | Haze          |
| Parameters                                                  | Mean $\pm$ SD     | Mean $\pm$ SD      | Mean $\pm$ SD     | Mean $\pm$ SD       | Mean $\pm$ SD       | Mean $\pm$ SD     | Mean $\pm$ SD       | Mean $\pm$ SD       | Mean $\pm$ SD       | Mean $\pm$ SD |
| T ( $^{\circ}$ C)                                           | $-17.3 \pm 5.2$   | $-17.0 \pm 6.7$    | $-17.6 \pm 1.4$   | $-1.6 \pm 2.1$      | $-0.9 \pm 2.1$      | $-2.9 \pm 1.5$    | $6.6 \pm 2.4$       | $5.1 \pm 1.6$       | $8.1 \pm 2.1$       |               |
| RH (%)                                                      | $66.2 \pm 5.9$    | $63.8 \pm 4.2$     | $69.4 \pm 6.4$    | $48.5 \pm 20.8$     | $35.2 \pm 6.5$      | $75.2 \pm 12.0$   | $73.8 \pm 16.9$     | $75.7 \pm 17.1$     | $72.0 \pm 16.4$     |               |
| Wind speed ( $\text{m s}^{-1}$ )                            | $2.6 \pm 0.8$     | $3.1 \pm 0.6$      | $1.9 \pm 0.6$     | $3.2 \pm 1.9$       | $3.9 \pm 1.9$       | $1.7 \pm 0.5$     | $2.9 \pm 1.1$       | $3.3 \pm 1.2$       | $2.6 \pm 0.8$       |               |
| PM <sub>2.5</sub> ( $\mu\text{g m}^{-3}$ )                  | $90.6 \pm 62.4$   | $45.3 \pm 16.8$    | $154.0 \pm 45.3$  | $52.7 \pm 51.4$     | $19.9 \pm 11.0$     | $118.3 \pm 35.2$  | $69.1 \pm 26.9$     | $47.4 \pm 16.7$     | $90.9 \pm 14.9$     |               |
| O <sub>3</sub> ( $\mu\text{g m}^{-3}$ )                     | $37.8 \pm 10.0$   | $43.9 \pm 7.6$     | $29.4 \pm 6.1$    | $31.2 \pm 17.5$     | $41.0 \pm 12.5$     | $11.6 \pm 5.7$    | $26.4 \pm 17.1$     | $23.7 \pm 14.3$     | $29.1 \pm 19.1$     |               |
| NO <sub>2</sub> ( $\mu\text{g m}^{-3}$ )                    | $52.6 \pm 19.6$   | $39.1 \pm 7.7$     | $71.3 \pm 15.4$   | $46.5 \pm 22.6$     | $33.4 \pm 15.0$     | $72.5 \pm 7.8$    | $61.6 \pm 15.2$     | $54.9 \pm 14.5$     | $68.3 \pm 12.7$     |               |
| NO <sub>2</sub> + O <sub>3</sub> ( $\mu\text{g m}^{-3}$ )   | $90.4 \pm 11.7$   | $83.0 \pm 4.8$     | $100.7 \pm 10.8$  | $77.6 \pm 7.3$      | $74.4 \pm 5.9$      | $84.0 \pm 5.6$    | $88.0 \pm 17.6$     | $78.5 \pm 11.5$     | $97.4 \pm 17.5$     |               |
| •OH ( $\times 10^5$ molecule $\text{cm}^{-3}$ )             | $8.1 \pm 3.2$     | $9.5 \pm 3.0$      | $6.3 \pm 2.4$     | $9.8 \pm 4.7$       | $12.8 \pm 2.1$      | $3.7 \pm 1.3$     | $4.9 \pm 3.1$       | $4.5 \pm 3.4$       | $5.2 \pm 2.8$       |               |
| SO <sub>2</sub> ( $\mu\text{g m}^{-3}$ )                    | $56.2 \pm 18.0$   | $44.4 \pm 9.5$     | $72.7 \pm 13.7$   | $7.0 \pm 3.2$       | $6.1 \pm 2.9$       | $8.7 \pm 3.1$     | $13.1 \pm 3.4$      | $11.6 \pm 2.5$      | $14.6 \pm 3.5$      |               |
| CO ( $\text{mg m}^{-3}$ )                                   | $1.2 \pm 0.5$     | $0.8 \pm 0.1$      | $1.8 \pm 0.4$     | $1.1 \pm 0.8$       | $0.7 \pm 0.3$       | $2.1 \pm 0.5$     | $1.2 \pm 0.2$       | $1.1 \pm 0.2$       | $1.3 \pm 0.1$       |               |
| ALW <sup>a</sup> ( $\mu\text{g m}^{-3}$ )                   | $31.5 \pm 23.6$   | $17.3 \pm 12.6$    | $51.4 \pm 20.9$   | $48.9 \pm 109.6$    | $4.8 \pm 2.6$       | $136.9 \pm 156.3$ | $64.6 \pm 66.1$     | $52.1 \pm 42.8$     | $77.2 \pm 81.2$     |               |
| pH                                                          | $4.3 \pm 1.0$     | $4.0 \pm 1.2$      | $4.9 \pm 0.3$     | $6.3 \pm 1.7$       | $7.4 \pm 0.8$       | $4.1 \pm 0.6$     | $3.4 \pm 0.6$       | $3.5 \pm 0.3$       | $3.2 \pm 0.7$       |               |
| PBLH <sup>b</sup> (m)                                       | $339.0 \pm 183.3$ | $457.3 \pm 150.4$  | $173.4 \pm 44.2$  | $407.9 \pm 313.3$   | $501 \pm 335.9$     | $221.6 \pm 129.1$ | $414.1 \pm 239.0$   | $445 \pm 226.5$     | $383.2 \pm 247.0$   |               |
| VC <sup>c</sup> ( $\text{m}^2 \text{s}^{-1}$ )              | $974.8 \pm 673.2$ | $1415.1 \pm 530.5$ | $358.5 \pm 206.0$ | $1877.4 \pm 2608.4$ | $2592.4 \pm 2931.7$ | $447.4 \pm 393.9$ | $1431.2 \pm 1200.3$ | $1692.5 \pm 1318.0$ | $1169.8 \pm 1003.8$ |               |
| UV ( $\text{W m}^{-2}$ )                                    | $71.1 \pm 6.1$    | $70.3 \pm 6.2$     | $72.3 \pm 5.7$    | $112.9 \pm 8.7$     | $112.2 \pm 10.3$    | $114.3 \pm 3.6$   | $128.1 \pm 56.6$    | $134.2 \pm 62.3$    | $122 \pm 49.4$      |               |
| Cl <sup>-</sup> ( $\mu\text{g m}^{-3}$ )                    | $5.9 \pm 4.9$     | $3.2 \pm 2.3$      | $9.7 \pm 5.0$     | $2.7 \pm 1.9$       | $1.7 \pm 1.0$       | $4.6 \pm 1.7$     | $2.1 \pm 1.1$       | $1.6 \pm 1.1$       | $2.6 \pm 0.8$       |               |
| Nss-Cl <sup>-</sup> ( $\mu\text{g m}^{-3}$ )                | $5.2 \pm 4.2$     | $2.8 \pm 2.1$      | $8.5 \pm 4.3$     | $2.0 \pm 1.8$       | $1.1 \pm 0.8$       | $3.8 \pm 1.9$     | $1.6 \pm 1.0$       | $1.1 \pm 1.0$       | $2.0 \pm 0.8$       |               |
| NO <sub>3</sub> <sup>-</sup> ( $\mu\text{g m}^{-3}$ )       | $9.2 \pm 6.4$     | $7.7 \pm 7.2$      | $11.3 \pm 4.2$    | $10.8 \pm 14.6$     | $2.6 \pm 1.8$       | $27.1 \pm 15.3$   | $18.9 \pm 7.7$      | $13.0 \pm 5.2$      | $24.8 \pm 4.8$      |               |
| SO <sub>4</sub> <sup>2-</sup> ( $\mu\text{g m}^{-3}$ )      | $11.4 \pm 7.0$    | $7.3 \pm 3.5$      | $17.3 \pm 6.6$    | $7.4 \pm 8.1$       | $2.7 \pm 1.0$       | $16.9 \pm 7.7$    | $9.9 \pm 3.5$       | $8.0 \pm 3.1$       | $11.8 \pm 2.9$      |               |
| NO <sub>3</sub> <sup>-</sup> /SO <sub>4</sub> <sup>2-</sup> | $0.8 \pm 0.4$     | $0.9 \pm 0.5$      | $0.7 \pm 0.2$     | $1.1 \pm 0.5$       | $1.0 \pm 0.4$       | $1.5 \pm 0.4$     | $2.0 \pm 0.7$       | $1.8 \pm 0.9$       | $2.1 \pm 0.3$       |               |
| NH <sub>4</sub> <sup>+</sup> /NO <sub>3</sub> <sup>-</sup>  | $1.0 \pm 0.2$     | $0.9 \pm 0.3$      | $1.1 \pm 0.3$     | $0.7 \pm 0.1$       | $0.7 \pm 0.1$       | $0.6 \pm 0.1$     | $0.5 \pm 0.1$       | $0.5 \pm 0.1$       | $0.4 \pm 0.1$       |               |
| K <sup>+</sup> ( $\mu\text{g m}^{-3}$ )                     | $1.9 \pm 1.3$     | $1.1 \pm 0.7$      | $3.0 \pm 1.3$     | $0.6 \pm 0.5$       | $0.4 \pm 0.3$       | $1.0 \pm 0.5$     | $0.8 \pm 0.3$       | $0.6 \pm 0.2$       | $0.9 \pm 0.2$       |               |
| Nss-K <sup>+</sup> ( $\mu\text{g m}^{-3}$ )                 | $1.9 \pm 1.3$     | $1.1 \pm 0.6$      | $3.0 \pm 1.3$     | $0.6 \pm 0.5$       | $0.4 \pm 0.3$       | $1.0 \pm 0.5$     | $0.8 \pm 0.3$       | $0.6 \pm 0.2$       | $0.9 \pm 0.2$       |               |
| Na <sup>+</sup> ( $\mu\text{g m}^{-3}$ )                    | $0.4 \pm 0.4$     | $0.2 \pm 0.1$      | $0.7 \pm 0.4$     | $0.4 \pm 0.2$       | $0.3 \pm 0.1$       | $0.5 \pm 0.2$     | $0.3 \pm 0.1$       | $0.3 \pm 0.1$       | $0.3 \pm 0.1$       |               |
| Ca <sup>2+</sup> ( $\mu\text{g m}^{-3}$ )                   | $0.9 \pm 0.4$     | $0.7 \pm 0.3$      | $1.2 \pm 0.3$     | $2.3 \pm 0.7$       | $2.7 \pm 0.2$       | $1.6 \pm 0.8$     | $2.2 \pm 1.5$       | $1.9 \pm 1.3$       | $2.4 \pm 1.7$       |               |

|                                                                    |             |             |             |             |              |              |               |               |               |
|--------------------------------------------------------------------|-------------|-------------|-------------|-------------|--------------|--------------|---------------|---------------|---------------|
| NH <sub>4</sub> <sup>+</sup> (μg m <sup>-3</sup> )                 | 8.2 ± 5.5   | 5.3 ± 3.4   | 12.4 ± 5.1  | 6.6 ± 9.1   | 1.7 ± 1.1    | 16.3 ± 10.2  | 8.3 ± 2.9     | 6.2 ± 1.5     | 10.4 ± 2.4    |
| HCOOH (μg m <sup>-3</sup> )                                        | 0.2 ± 0.2   | 0.10 ± 0.07 | 0.43 ± 0.25 | 0.07 ± 0.09 | 0.03 ± 0.04  | 0.14 ± 0.13  | 0.03 ± 0.02   | 0.02 ± 0.01   | 0.04 ± 0.02   |
| CH <sub>3</sub> COOH (μg m <sup>-3</sup> )                         | 0.3 ± 0.2   | 0.18 ± 0.11 | 0.43 ± 0.24 | 0.06 ± 0.07 | 0.04 ± 0.04  | 0.11 ± 0.08  | 0.06 ± 0.04   | 0.07 ± 0.04   | 0.04 ± 0.02   |
| C <sub>2</sub> H <sub>2</sub> O <sub>4</sub> (μg m <sup>-3</sup> ) | 0.4 ± 0.2   | 0.25 ± 0.19 | 0.48 ± 0.10 | 0.21 ± 0.18 | 0.11 ± 0.05  | 0.40 ± 0.18  | 0.2 ± 0.22    | 0.08 ± 0.1    | 0.2 ± 0.3     |
| C <sub>4</sub> H <sub>6</sub> O <sub>4</sub> (μg m <sup>-3</sup> ) | 0.3 ± 0.3   | 0.3 ± 0.3   | 0.2 ± 0.2   | 0.03 ± 0.04 | 0.01 ± 0.01  | 0.06 ± 0.05  | 0.007 ± 0.004 | 0.006 ± 0.005 | 0.008 ± 0.002 |
| C <sub>5</sub> H <sub>8</sub> O <sub>4</sub> (μg m <sup>-3</sup> ) | 0.1 ± 0.04  | 0.02 ± 0.01 | 0.07 ± 0.04 | 0.02 ± 0.01 | 0.01 ± 0.002 | 0.04 ± 0.005 | 0.007 ± 0.008 | 0.005 ± 0.003 | 0.009 ± 0.010 |
| CH <sub>4</sub> O <sub>3</sub> S (μg m <sup>-3</sup> )             | 0.03 ± 0.02 | 0.02 ± 0.02 | 0.04 ± 0.01 | 0.06 ± 0.05 | 0.01 ± 0.001 | 0.07 ± 0.05  | 0.051 ± 0.027 | 0.03 ± 0.02   | 0.07 ± 0.02   |

<sup>a</sup>Aerosol liquid water.

<sup>b</sup>Planetary boundary layer height.

<sup>c</sup>Ventilation coefficient.

**Table S2.** The molecular formula list of potential isoprene-derived CHON compounds.

| Formula <sup>a</sup>                                          | C | H  | N | O  |
|---------------------------------------------------------------|---|----|---|----|
| C <sub>4</sub> H <sub>7</sub> N <sub>1</sub> O <sub>5</sub>   | 4 | 7  | 1 | 5  |
| C <sub>4</sub> H <sub>7</sub> N <sub>1</sub> O <sub>6</sub>   | 4 | 7  | 1 | 6  |
| C <sub>4</sub> H <sub>7</sub> N <sub>1</sub> O <sub>7</sub>   | 4 | 7  | 1 | 7  |
| C <sub>4</sub> H <sub>9</sub> N <sub>1</sub> O <sub>7</sub>   | 4 | 9  | 1 | 7  |
| C <sub>4</sub> H <sub>7</sub> N <sub>1</sub> O <sub>8</sub>   | 4 | 7  | 1 | 8  |
| C <sub>4</sub> H <sub>7</sub> N <sub>1</sub> O <sub>9</sub>   | 4 | 7  | 1 | 9  |
| C <sub>4</sub> H <sub>6</sub> N <sub>2</sub> O <sub>6</sub>   | 4 | 6  | 2 | 6  |
| C <sub>4</sub> H <sub>6</sub> N <sub>2</sub> O <sub>7</sub>   | 4 | 6  | 2 | 7  |
| C <sub>4</sub> H <sub>8</sub> N <sub>2</sub> O <sub>7</sub>   | 4 | 8  | 2 | 7  |
| C <sub>4</sub> H <sub>6</sub> N <sub>2</sub> O <sub>8</sub>   | 4 | 6  | 2 | 8  |
| C <sub>4</sub> H <sub>8</sub> N <sub>2</sub> O <sub>8</sub>   | 4 | 8  | 2 | 8  |
| C <sub>4</sub> H <sub>7</sub> N <sub>2</sub> O <sub>9</sub>   | 4 | 7  | 2 | 9  |
| C <sub>4</sub> H <sub>8</sub> N <sub>2</sub> O <sub>9</sub>   | 4 | 8  | 2 | 9  |
| C <sub>4</sub> H <sub>8</sub> N <sub>2</sub> O <sub>10</sub>  | 4 | 8  | 2 | 10 |
| C <sub>4</sub> H <sub>7</sub> N <sub>3</sub> O <sub>9</sub>   | 4 | 7  | 3 | 9  |
| C <sub>4</sub> H <sub>7</sub> N <sub>3</sub> O <sub>10</sub>  | 4 | 7  | 3 | 10 |
| C <sub>4</sub> H <sub>7</sub> N <sub>3</sub> O <sub>11</sub>  | 4 | 7  | 3 | 11 |
| C <sub>5</sub> H <sub>7</sub> N <sub>1</sub> O <sub>4</sub>   | 5 | 7  | 1 | 4  |
| C <sub>5</sub> H <sub>9</sub> N <sub>1</sub> O <sub>4</sub>   | 5 | 9  | 1 | 4  |
| C <sub>5</sub> H <sub>7</sub> N <sub>1</sub> O <sub>5</sub>   | 5 | 7  | 1 | 5  |
| C <sub>5</sub> H <sub>9</sub> N <sub>1</sub> O <sub>5</sub>   | 5 | 9  | 1 | 5  |
| C <sub>5</sub> H <sub>7</sub> N <sub>1</sub> O <sub>6</sub>   | 5 | 7  | 1 | 6  |
| C <sub>5</sub> H <sub>9</sub> N <sub>1</sub> O <sub>6</sub>   | 5 | 9  | 1 | 6  |
| C <sub>5</sub> H <sub>11</sub> N <sub>1</sub> O <sub>6</sub>  | 5 | 11 | 1 | 6  |
| C <sub>5</sub> H <sub>7</sub> N <sub>1</sub> O <sub>7</sub>   | 5 | 7  | 1 | 7  |
| C <sub>5</sub> H <sub>9</sub> N <sub>1</sub> O <sub>7</sub>   | 5 | 9  | 1 | 7  |
| C <sub>5</sub> H <sub>11</sub> N <sub>1</sub> O <sub>7</sub>  | 5 | 11 | 1 | 7  |
| C <sub>5</sub> H <sub>7</sub> N <sub>1</sub> O <sub>8</sub>   | 5 | 7  | 1 | 8  |
| C <sub>5</sub> H <sub>8</sub> N <sub>1</sub> O <sub>8</sub>   | 5 | 8  | 1 | 8  |
| C <sub>5</sub> H <sub>9</sub> N <sub>1</sub> O <sub>8</sub>   | 5 | 9  | 1 | 8  |
| C <sub>5</sub> H <sub>11</sub> N <sub>1</sub> O <sub>8</sub>  | 5 | 11 | 1 | 8  |
| C <sub>5</sub> H <sub>7</sub> N <sub>1</sub> O <sub>9</sub>   | 5 | 7  | 1 | 9  |
| C <sub>5</sub> H <sub>8</sub> N <sub>1</sub> O <sub>9</sub>   | 5 | 8  | 1 | 9  |
| C <sub>5</sub> H <sub>9</sub> N <sub>1</sub> O <sub>9</sub>   | 5 | 9  | 1 | 9  |
| C <sub>5</sub> H <sub>11</sub> N <sub>1</sub> O <sub>9</sub>  | 5 | 11 | 1 | 9  |
| C <sub>5</sub> H <sub>13</sub> N <sub>1</sub> O <sub>9</sub>  | 5 | 13 | 1 | 9  |
| C <sub>5</sub> H <sub>8</sub> N <sub>1</sub> O <sub>10</sub>  | 5 | 8  | 1 | 10 |
| C <sub>5</sub> H <sub>9</sub> N <sub>1</sub> O <sub>10</sub>  | 5 | 9  | 1 | 10 |
| C <sub>5</sub> H <sub>11</sub> N <sub>1</sub> O <sub>10</sub> | 5 | 11 | 1 | 10 |
| C <sub>5</sub> H <sub>10</sub> N <sub>1</sub> O <sub>11</sub> | 5 | 10 | 1 | 11 |
| C <sub>5</sub> H <sub>10</sub> N <sub>2</sub> O <sub>6</sub>  | 5 | 10 | 2 | 6  |
| C <sub>5</sub> H <sub>8</sub> N <sub>2</sub> O <sub>7</sub>   | 5 | 8  | 2 | 7  |

|                         |    |    |   |    |
|-------------------------|----|----|---|----|
| $C_5H_{10}N_2O_7$       | 5  | 10 | 2 | 7  |
| $C_5H_6N_2O_8$          | 5  | 6  | 2 | 8  |
| $C_5H_8N_2O_8$          | 5  | 8  | 2 | 8  |
| $C_5H_{10}N_2O_8$       | 5  | 10 | 2 | 8  |
| $C_5H_8N_2O_9$          | 5  | 8  | 2 | 9  |
| $C_5H_9N_2O_9$          | 5  | 9  | 2 | 9  |
| $C_5H_{10}N_2O_9$       | 5  | 10 | 2 | 9  |
| $C_5H_{12}N_2O_9$       | 5  | 12 | 2 | 9  |
| $C_5H_8N_2O_{10}$       | 5  | 8  | 2 | 10 |
| $C_5H_9N_2O_{10}$       | 5  | 9  | 2 | 10 |
| $C_5H_{10}N_2O_{10}$    | 5  | 10 | 2 | 10 |
| $C_5H_{12}N_2O_{10}$    | 5  | 12 | 2 | 10 |
| $C_5H_8N_2O_{11}$       | 5  | 8  | 2 | 11 |
| $C_5H_{10}N_2O_{11}$    | 5  | 10 | 2 | 11 |
| $C_5H_{12}N_2O_{11}$    | 5  | 12 | 2 | 11 |
| $C_5H_9N_3O_9$          | 5  | 9  | 3 | 9  |
| $C_5H_{11}N_3O_9$       | 5  | 11 | 3 | 9  |
| $C_5H_9N_3O_{10}$       | 5  | 9  | 3 | 10 |
| $C_5H_{11}N_3O_{10}$    | 5  | 11 | 3 | 10 |
| $C_5H_9N_3O_{11}$       | 5  | 9  | 3 | 11 |
| $C_5H_{11}N_3O_{11}$    | 5  | 11 | 3 | 11 |
| $C_5H_9N_3O_{12}$       | 5  | 9  | 3 | 12 |
| $C_5H_9N_3O_{13}$       | 5  | 9  | 3 | 13 |
| $C_5H_{11}N_3O_{13}$    | 5  | 11 | 3 | 13 |
| $C_5H_9N_4O_{12}$       | 5  | 9  | 4 | 12 |
| $C_5H_{10}N_4O_{12}$    | 5  | 10 | 4 | 12 |
| $C_5H_{10}N_4O_{13}$    | 5  | 10 | 4 | 13 |
| $C_{10}H_{15}N_1O_{10}$ | 10 | 15 | 1 | 10 |
| $C_{10}H_{16}N_2O_8$    | 10 | 16 | 2 | 8  |
| $C_{10}H_{16}N_2O_9$    | 10 | 16 | 2 | 9  |
| $C_{10}H_{16}N_2O_{10}$ | 10 | 16 | 2 | 10 |
| $C_{10}H_{16}N_2O_{11}$ | 10 | 16 | 2 | 11 |
| $C_{10}H_{18}N_2O_{11}$ | 10 | 18 | 2 | 11 |
| $C_{10}H_{16}N_2O_{12}$ | 10 | 16 | 2 | 12 |
| $C_{10}H_{16}N_2O_{13}$ | 10 | 16 | 2 | 13 |
| $C_{10}H_{16}N_2O_{14}$ | 10 | 16 | 2 | 14 |
| $C_{10}H_{16}N_2O_{15}$ | 10 | 16 | 2 | 15 |
| $C_{10}H_{16}N_2O_{17}$ | 10 | 16 | 2 | 17 |
| $C_{10}H_{17}N_3O_{12}$ | 10 | 17 | 3 | 12 |
| $C_{10}H_{13}N_3O_{13}$ | 10 | 13 | 3 | 13 |
| $C_{10}H_{17}N_3O_{13}$ | 10 | 17 | 3 | 13 |
| $C_{10}H_{15}N_3O_{14}$ | 10 | 15 | 3 | 14 |
| $C_{10}H_{17}N_3O_{14}$ | 10 | 17 | 3 | 14 |

|                         |    |    |   |    |
|-------------------------|----|----|---|----|
| $C_{10}H_{17}N_3O_{15}$ | 10 | 17 | 3 | 15 |
| $C_{10}H_{17}N_3O_{16}$ | 10 | 17 | 3 | 16 |
| $C_{10}H_{17}N_3O_{17}$ | 10 | 17 | 3 | 17 |
| $C_{10}H_{17}N_3O_{18}$ | 10 | 17 | 3 | 18 |
| $C_{10}H_{18}N_4O_{16}$ | 10 | 18 | 4 | 16 |
| $C_{10}H_{18}N_4O_{17}$ | 10 | 18 | 4 | 17 |
| $C_{10}H_{17}N_5O_{18}$ | 10 | 17 | 5 | 18 |
| $C_{15}H_{24}N_4O_{18}$ | 15 | 24 | 4 | 18 |
| $C_{15}H_{24}N_4O_{21}$ | 15 | 24 | 4 | 21 |
| $C_{15}H_{24}N_4O_{22}$ | 15 | 24 | 4 | 22 |
| $C_{15}H_{25}N_5O_{21}$ | 15 | 25 | 5 | 21 |

<sup>a</sup>The molecular formulas were summarized from previous studies (Ng et al., 2008; Guo et al., 2022b; Xu et al., 2021b; Zhao et al., 2021; Tian et al., 2023; Wu et al., 2021).

**Table S3.** The molecular formula list of potential monoterpene-derived CHON compounds.

| Formula <sup>a</sup>                                          | C | H  | N | O  |
|---------------------------------------------------------------|---|----|---|----|
| C <sub>6</sub> H <sub>7</sub> N <sub>1</sub> O <sub>6</sub>   | 6 | 7  | 1 | 6  |
| C <sub>6</sub> H <sub>7</sub> N <sub>1</sub> O <sub>7</sub>   | 6 | 7  | 1 | 7  |
| C <sub>6</sub> H <sub>7</sub> N <sub>1</sub> O <sub>8</sub>   | 6 | 7  | 1 | 8  |
| C <sub>6</sub> H <sub>9</sub> N <sub>1</sub> O <sub>9</sub>   | 6 | 9  | 1 | 9  |
| C <sub>6</sub> H <sub>7</sub> N <sub>1</sub> O <sub>10</sub>  | 6 | 7  | 1 | 10 |
| C <sub>6</sub> H <sub>7</sub> N <sub>1</sub> O <sub>11</sub>  | 6 | 7  | 1 | 11 |
| C <sub>6</sub> H <sub>6</sub> N <sub>2</sub> O <sub>9</sub>   | 6 | 6  | 2 | 9  |
| C <sub>6</sub> H <sub>10</sub> N <sub>2</sub> O <sub>10</sub> | 6 | 10 | 2 | 10 |
| C <sub>7</sub> H <sub>9</sub> N <sub>1</sub> O <sub>5</sub>   | 7 | 9  | 1 | 5  |
| C <sub>7</sub> H <sub>11</sub> N <sub>1</sub> O <sub>5</sub>  | 7 | 11 | 1 | 5  |
| C <sub>7</sub> H <sub>9</sub> N <sub>1</sub> O <sub>6</sub>   | 7 | 9  | 1 | 6  |
| C <sub>7</sub> H <sub>11</sub> N <sub>1</sub> O <sub>6</sub>  | 7 | 11 | 1 | 6  |
| C <sub>7</sub> H <sub>7</sub> N <sub>1</sub> O <sub>7</sub>   | 7 | 7  | 1 | 7  |
| C <sub>7</sub> H <sub>9</sub> N <sub>1</sub> O <sub>7</sub>   | 7 | 9  | 1 | 7  |
| C <sub>7</sub> H <sub>11</sub> N <sub>1</sub> O <sub>7</sub>  | 7 | 11 | 1 | 7  |
| C <sub>7</sub> H <sub>7</sub> N <sub>1</sub> O <sub>8</sub>   | 7 | 7  | 1 | 8  |
| C <sub>7</sub> H <sub>8</sub> N <sub>1</sub> O <sub>8</sub>   | 7 | 8  | 1 | 8  |
| C <sub>7</sub> H <sub>9</sub> N <sub>1</sub> O <sub>8</sub>   | 7 | 9  | 1 | 8  |
| C <sub>7</sub> H <sub>10</sub> N <sub>1</sub> O <sub>8</sub>  | 7 | 10 | 1 | 8  |
| C <sub>7</sub> H <sub>11</sub> N <sub>1</sub> O <sub>8</sub>  | 7 | 11 | 1 | 8  |
| C <sub>7</sub> H <sub>9</sub> N <sub>1</sub> O <sub>9</sub>   | 7 | 9  | 1 | 9  |
| C <sub>7</sub> H <sub>10</sub> N <sub>1</sub> O <sub>9</sub>  | 7 | 10 | 1 | 9  |
| C <sub>7</sub> H <sub>11</sub> N <sub>1</sub> O <sub>9</sub>  | 7 | 11 | 1 | 9  |
| C <sub>7</sub> H <sub>9</sub> N <sub>1</sub> O <sub>10</sub>  | 7 | 9  | 1 | 10 |
| C <sub>7</sub> H <sub>10</sub> N <sub>1</sub> O <sub>10</sub> | 7 | 10 | 1 | 10 |
| C <sub>7</sub> H <sub>11</sub> N <sub>1</sub> O <sub>10</sub> | 7 | 11 | 1 | 10 |
| C <sub>7</sub> H <sub>9</sub> N <sub>1</sub> O <sub>11</sub>  | 7 | 9  | 1 | 11 |
| C <sub>7</sub> H <sub>10</sub> N <sub>1</sub> O <sub>11</sub> | 7 | 10 | 1 | 11 |
| C <sub>7</sub> H <sub>11</sub> N <sub>1</sub> O <sub>11</sub> | 7 | 11 | 1 | 11 |
| C <sub>7</sub> H <sub>9</sub> N <sub>1</sub> O <sub>12</sub>  | 7 | 9  | 1 | 12 |
| C <sub>7</sub> H <sub>10</sub> N <sub>1</sub> O <sub>12</sub> | 7 | 10 | 1 | 12 |
| C <sub>7</sub> H <sub>11</sub> N <sub>1</sub> O <sub>12</sub> | 7 | 11 | 1 | 12 |
| C <sub>7</sub> H <sub>11</sub> N <sub>1</sub> O <sub>15</sub> | 7 | 11 | 1 | 15 |
| C <sub>7</sub> H <sub>8</sub> N <sub>2</sub> O <sub>8</sub>   | 7 | 8  | 2 | 8  |
| C <sub>7</sub> H <sub>8</sub> N <sub>2</sub> O <sub>10</sub>  | 7 | 8  | 2 | 10 |
| C <sub>7</sub> H <sub>8</sub> N <sub>2</sub> O <sub>11</sub>  | 7 | 8  | 2 | 11 |
| C <sub>7</sub> H <sub>8</sub> N <sub>2</sub> O <sub>12</sub>  | 7 | 8  | 2 | 12 |
| C <sub>7</sub> H <sub>8</sub> N <sub>2</sub> O <sub>13</sub>  | 7 | 8  | 2 | 13 |
| C <sub>7</sub> H <sub>8</sub> N <sub>2</sub> O <sub>14</sub>  | 7 | 8  | 2 | 14 |
| C <sub>7</sub> H <sub>10</sub> N <sub>2</sub> O <sub>14</sub> | 7 | 10 | 2 | 14 |
| C <sub>8</sub> H <sub>13</sub> N <sub>1</sub> O <sub>5</sub>  | 8 | 13 | 1 | 5  |

|                      |   |    |   |    |
|----------------------|---|----|---|----|
| $C_8H_{17}N_1O_5$    | 8 | 17 | 1 | 5  |
| $C_8H_{11}N_1O_6$    | 8 | 11 | 1 | 6  |
| $C_8H_{11}N_1O_7$    | 8 | 11 | 1 | 7  |
| $C_8H_{12}N_1O_7$    | 8 | 12 | 1 | 7  |
| $C_8H_{11}N_1O_8$    | 8 | 11 | 1 | 8  |
| $C_8H_{12}N_1O_8$    | 8 | 12 | 1 | 8  |
| $C_8H_{13}N_1O_8$    | 8 | 13 | 1 | 8  |
| $C_8H_{15}N_1O_8$    | 8 | 15 | 1 | 8  |
| $C_8H_{11}N_1O_9$    | 8 | 11 | 1 | 9  |
| $C_8H_{12}N_1O_9$    | 8 | 12 | 1 | 9  |
| $C_8H_{13}N_1O_9$    | 8 | 13 | 1 | 9  |
| $C_8H_{11}N_1O_{10}$ | 8 | 11 | 1 | 10 |
| $C_8H_{12}N_1O_{10}$ | 8 | 12 | 1 | 10 |
| $C_8H_{13}N_1O_{10}$ | 8 | 13 | 1 | 10 |
| $C_8H_{11}N_1O_{11}$ | 8 | 11 | 1 | 11 |
| $C_8H_{12}N_1O_{11}$ | 8 | 12 | 1 | 11 |
| $C_8H_{13}N_1O_{11}$ | 8 | 13 | 1 | 11 |
| $C_8H_{11}N_1O_{12}$ | 8 | 11 | 1 | 12 |
| $C_8H_{12}N_1O_{12}$ | 8 | 12 | 1 | 12 |
| $C_8H_{13}N_1O_{12}$ | 8 | 13 | 1 | 12 |
| $C_8H_{11}N_1O_{13}$ | 8 | 11 | 1 | 13 |
| $C_8H_{10}N_2O_8$    | 8 | 10 | 2 | 8  |
| $C_8H_{10}N_2O_{14}$ | 8 | 10 | 2 | 14 |
| $C_9H_{11}N_1O_2$    | 9 | 11 | 1 | 2  |
| $C_9H_{13}N_1O_2$    | 9 | 13 | 1 | 2  |
| $C_9H_{17}N_1O_3$    | 9 | 17 | 1 | 3  |
| $C_9H_{13}N_1O_4$    | 9 | 13 | 1 | 4  |
| $C_9H_{14}N_1O_4$    | 9 | 14 | 1 | 4  |
| $C_9H_{15}N_1O_4$    | 9 | 15 | 1 | 4  |
| $C_9H_{11}N_1O_5$    | 9 | 11 | 1 | 5  |
| $C_9H_{13}N_1O_5$    | 9 | 13 | 1 | 5  |
| $C_9H_{12}N_1O_6$    | 9 | 12 | 1 | 6  |
| $C_9H_{13}N_1O_6$    | 9 | 13 | 1 | 6  |
| $C_9H_{16}N_1O_6$    | 9 | 16 | 1 | 6  |
| $C_9H_{13}N_1O_7$    | 9 | 13 | 1 | 7  |
| $C_9H_{14}N_1O_7$    | 9 | 14 | 1 | 7  |
| $C_9H_{15}N_1O_7$    | 9 | 15 | 1 | 7  |
| $C_9H_{13}N_1O_8$    | 9 | 13 | 1 | 8  |
| $C_9H_{14}N_1O_8$    | 9 | 14 | 1 | 8  |
| $C_9H_{15}N_1O_8$    | 9 | 15 | 1 | 8  |
| $C_9H_{16}N_1O_8$    | 9 | 16 | 1 | 8  |
| $C_9H_{13}N_1O_9$    | 9 | 13 | 1 | 9  |
| $C_9H_{14}N_1O_9$    | 9 | 14 | 1 | 9  |
| $C_9H_{15}N_1O_9$    | 9 | 15 | 1 | 9  |



|                      |    |    |   |    |
|----------------------|----|----|---|----|
| $C_9H_{13}N_1O_{10}$ | 9  | 13 | 1 | 10 |
| $C_9H_{14}N_1O_{10}$ | 9  | 14 | 1 | 10 |
| $C_9H_{15}N_1O_{10}$ | 9  | 15 | 1 | 10 |
| $C_9H_{13}N_1O_{11}$ | 9  | 13 | 1 | 11 |
| $C_9H_{14}N_1O_{11}$ | 9  | 14 | 1 | 11 |
| $C_9H_{15}N_1O_{11}$ | 9  | 15 | 1 | 11 |
| $C_9H_{13}N_1O_{12}$ | 9  | 13 | 1 | 12 |
| $C_9H_{14}N_1O_{12}$ | 9  | 14 | 1 | 12 |
| $C_9H_{15}N_1O_{12}$ | 9  | 15 | 1 | 12 |
| $C_9H_{13}N_1O_{13}$ | 9  | 13 | 1 | 13 |
| $C_9H_{14}N_1O_{13}$ | 9  | 14 | 1 | 13 |
| $C_9H_{15}N_1O_{13}$ | 9  | 15 | 1 | 13 |
| $C_9H_{13}N_1O_{14}$ | 9  | 13 | 1 | 14 |
| $C_9H_{14}N_1O_{14}$ | 9  | 14 | 1 | 14 |
| $C_9H_{15}N_1O_{14}$ | 9  | 15 | 1 | 14 |
| $C_9H_{13}N_2O_7$    | 9  | 13 | 2 | 7  |
| $C_9H_{14}N_2O_8$    | 9  | 14 | 2 | 8  |
| $C_9H_{10}N_2O_9$    | 9  | 10 | 2 | 9  |
| $C_9H_{11}N_2O_9$    | 9  | 11 | 2 | 9  |
| $C_9H_{12}N_2O_9$    | 9  | 12 | 2 | 9  |
| $C_9H_{10}N_2O_{10}$ | 9  | 10 | 2 | 10 |
| $C_9H_{11}N_2O_{10}$ | 9  | 11 | 2 | 10 |
| $C_9H_{12}N_2O_{10}$ | 9  | 12 | 2 | 10 |
| $C_9H_{10}N_2O_{11}$ | 9  | 10 | 2 | 11 |
| $C_9H_{11}N_2O_{11}$ | 9  | 11 | 2 | 11 |
| $C_9H_{12}N_2O_{11}$ | 9  | 12 | 2 | 11 |
| $C_9H_{10}N_2O_{12}$ | 9  | 10 | 2 | 12 |
| $C_9H_{11}N_2O_{12}$ | 9  | 11 | 2 | 12 |
| $C_9H_{12}N_2O_{12}$ | 9  | 12 | 2 | 12 |
| $C_9H_{14}N_2O_{12}$ | 9  | 14 | 2 | 12 |
| $C_{10}H_{15}N_1O_3$ | 10 | 15 | 1 | 3  |
| $C_{10}H_{17}N_1O_3$ | 10 | 17 | 1 | 3  |
| $C_{10}H_{15}N_1O_4$ | 10 | 15 | 1 | 4  |
| $C_{10}H_{17}N_1O_4$ | 10 | 17 | 1 | 4  |
| $C_{10}H_{19}N_1O_4$ | 10 | 19 | 1 | 4  |
| $C_{10}H_{15}N_1O_5$ | 10 | 15 | 1 | 5  |
| $C_{10}H_{17}N_1O_5$ | 10 | 17 | 1 | 5  |
| $C_{10}H_{13}N_1O_6$ | 10 | 13 | 1 | 6  |
| $C_{10}H_{15}N_1O_6$ | 10 | 15 | 1 | 6  |
| $C_{10}H_{16}N_1O_6$ | 10 | 16 | 1 | 6  |
| $C_{10}H_{17}N_1O_6$ | 10 | 17 | 1 | 6  |
| $C_{10}H_{13}N_1O_7$ | 10 | 13 | 1 | 7  |
| $C_{10}H_{15}N_1O_7$ | 10 | 15 | 1 | 7  |
| $C_{10}H_{16}N_1O_7$ | 10 | 16 | 1 | 7  |

|                         |    |    |   |    |
|-------------------------|----|----|---|----|
| $C_{10}H_{17}N_1O_7$    | 10 | 17 | 1 | 7  |
| $C_{10}H_{13}N_1O_8$    | 10 | 13 | 1 | 8  |
| $C_{10}H_{15}N_1O_8$    | 10 | 15 | 1 | 8  |
| $C_{10}H_{16}N_1O_8$    | 10 | 16 | 1 | 8  |
| $C_{10}H_{17}N_1O_8$    | 10 | 17 | 1 | 8  |
| $C_{10}H_{13}N_1O_9$    | 10 | 13 | 1 | 9  |
| $C_{10}H_{15}N_1O_9$    | 10 | 15 | 1 | 9  |
| $C_{10}H_{16}N_1O_9$    | 10 | 16 | 1 | 9  |
| $C_{10}H_{17}N_1O_9$    | 10 | 17 | 1 | 9  |
| $C_{10}H_{15}N_1O_{10}$ | 10 | 15 | 1 | 10 |
| $C_{10}H_{16}N_1O_{10}$ | 10 | 16 | 1 | 10 |
| $C_{10}H_{17}N_1O_{10}$ | 10 | 17 | 1 | 10 |
| $C_{10}H_{15}N_1O_{11}$ | 10 | 15 | 1 | 11 |
| $C_{10}H_{16}N_1O_{11}$ | 10 | 16 | 1 | 11 |
| $C_{10}H_{17}N_1O_{11}$ | 10 | 17 | 1 | 11 |
| $C_{10}H_{18}N_1O_{11}$ | 10 | 18 | 1 | 11 |
| $C_{10}H_{15}N_1O_{12}$ | 10 | 15 | 1 | 12 |
| $C_{10}H_{16}N_1O_{12}$ | 10 | 16 | 1 | 12 |
| $C_{10}H_{17}N_1O_{12}$ | 10 | 17 | 1 | 12 |
| $C_{10}H_{15}N_1O_{13}$ | 10 | 15 | 1 | 13 |
| $C_{10}H_{16}N_1O_{13}$ | 10 | 16 | 1 | 13 |
| $C_{10}H_{17}N_1O_{13}$ | 10 | 17 | 1 | 13 |
| $C_{10}H_{15}N_1O_{14}$ | 10 | 15 | 1 | 14 |
| $C_{10}H_{16}N_1O_{14}$ | 10 | 16 | 1 | 14 |
| $C_{10}H_{17}N_1O_{14}$ | 10 | 17 | 1 | 14 |
| $C_{10}H_{15}N_1O_{15}$ | 10 | 15 | 1 | 15 |
| $C_{10}H_{16}N_1O_{15}$ | 10 | 16 | 1 | 15 |
| $C_{10}H_{17}N_1O_{15}$ | 10 | 17 | 1 | 15 |
| $C_{10}H_{12}N_2O_5$    | 10 | 12 | 2 | 5  |
| $C_{10}H_{20}N_2O_6$    | 10 | 20 | 2 | 6  |
| $C_{10}H_{12}N_2O_8$    | 10 | 12 | 2 | 8  |
| $C_{10}H_{14}N_2O_8$    | 10 | 14 | 2 | 8  |
| $C_{10}H_{15}N_2O_8$    | 10 | 15 | 2 | 8  |
| $C_{10}H_{16}N_2O_8$    | 10 | 16 | 2 | 8  |
| $C_{10}H_{18}N_2O_8$    | 10 | 18 | 2 | 8  |
| $C_{10}H_{12}N_2O_9$    | 10 | 12 | 2 | 9  |
| $C_{10}H_{14}N_2O_9$    | 10 | 14 | 2 | 9  |
| $C_{10}H_{15}N_2O_9$    | 10 | 15 | 2 | 9  |
| $C_{10}H_{16}N_2O_9$    | 10 | 16 | 2 | 9  |
| $C_{10}H_{18}N_2O_9$    | 10 | 18 | 2 | 9  |
| $C_{10}H_{12}N_2O_{10}$ | 10 | 12 | 2 | 10 |
| $C_{10}H_{14}N_2O_{10}$ | 10 | 14 | 2 | 10 |
| $C_{10}H_{15}N_2O_{10}$ | 10 | 15 | 2 | 10 |
| $C_{10}H_{16}N_2O_{10}$ | 10 | 16 | 2 | 10 |

|                         |    |    |   |    |
|-------------------------|----|----|---|----|
| $C_{10}H_{14}N_2O_{11}$ | 10 | 14 | 2 | 11 |
| $C_{10}H_{15}N_2O_{11}$ | 10 | 15 | 2 | 11 |
| $C_{10}H_{16}N_2O_{11}$ | 10 | 16 | 2 | 11 |
| $C_{10}H_{14}N_2O_{12}$ | 10 | 14 | 2 | 12 |
| $C_{10}H_{15}N_2O_{12}$ | 10 | 15 | 2 | 12 |
| $C_{10}H_{16}N_2O_{12}$ | 10 | 16 | 2 | 12 |
| $C_{10}H_{17}N_2O_{12}$ | 10 | 17 | 2 | 12 |
| $C_{10}H_{14}N_2O_{13}$ | 10 | 14 | 2 | 13 |
| $C_{10}H_{15}N_2O_{13}$ | 10 | 15 | 2 | 13 |
| $C_{10}H_{16}N_2O_{13}$ | 10 | 16 | 2 | 13 |
| $C_{10}H_{18}N_2O_{13}$ | 10 | 18 | 2 | 13 |
| $C_{10}H_{14}N_2O_{14}$ | 10 | 14 | 2 | 14 |
| $C_{10}H_{15}N_2O_{14}$ | 10 | 15 | 2 | 14 |
| $C_{10}H_{16}N_2O_{14}$ | 10 | 16 | 2 | 14 |
| $C_{10}H_{18}N_2O_{14}$ | 10 | 18 | 2 | 14 |
| $C_{10}H_{14}N_2O_{15}$ | 10 | 14 | 2 | 15 |
| $C_{10}H_{15}N_2O_{15}$ | 10 | 15 | 2 | 15 |
| $C_{10}H_{16}N_2O_{15}$ | 10 | 16 | 2 | 15 |
| $C_{10}H_{14}N_2O_{16}$ | 10 | 14 | 2 | 16 |
| $C_{10}H_{15}N_2O_{16}$ | 10 | 15 | 2 | 16 |
| $C_{10}H_{16}N_2O_{16}$ | 10 | 16 | 2 | 16 |
| $C_{10}H_{15}N_3O_{11}$ | 10 | 15 | 3 | 11 |
| $C_{10}H_{17}N_3O_{12}$ | 10 | 17 | 3 | 12 |
| $C_{10}H_{15}N_3O_{13}$ | 10 | 15 | 3 | 13 |
| $C_{10}H_{17}N_3O_{13}$ | 10 | 17 | 3 | 13 |
| $C_{10}H_{15}N_3O_{14}$ | 10 | 15 | 3 | 14 |
| $C_{10}H_{17}N_3O_{14}$ | 10 | 17 | 3 | 14 |
| $C_{10}H_{15}N_3O_{15}$ | 10 | 15 | 3 | 15 |
| $C_{10}H_{17}N_3O_{15}$ | 10 | 17 | 3 | 15 |
| $C_{10}H_{17}N_3O_{16}$ | 10 | 17 | 3 | 16 |
| $C_{11}H_{23}N_1O_3$    | 11 | 23 | 1 | 3  |
| $C_{11}H_{17}N_1O_5$    | 11 | 17 | 1 | 5  |
| $C_{11}H_{20}N_2O_5$    | 11 | 20 | 2 | 5  |
| $C_{11}H_{18}N_2O_{10}$ | 11 | 18 | 2 | 10 |
| $C_{12}H_{23}N_1O_3$    | 12 | 23 | 1 | 3  |
| $C_{13}H_{25}N_1O_2$    | 13 | 25 | 1 | 2  |
| $C_{13}H_{26}N_1O_{12}$ | 13 | 26 | 1 | 12 |
| $C_{14}H_{26}N_1O_{10}$ | 14 | 26 | 1 | 10 |
| $C_{14}H_{24}N_2O_5$    | 14 | 24 | 2 | 5  |
| $C_{15}H_{30}N_1O_{14}$ | 15 | 30 | 1 | 14 |
| $C_{16}H_{35}N_1O_3$    | 16 | 35 | 1 | 3  |
| $C_{16}H_{32}N_1O_{13}$ | 16 | 32 | 1 | 13 |
| $C_{16}H_{32}N_1O_{14}$ | 16 | 32 | 1 | 14 |
| $C_{16}H_{32}N_1O_{15}$ | 16 | 32 | 1 | 15 |

|                                                                |    |    |   |    |
|----------------------------------------------------------------|----|----|---|----|
| C <sub>17</sub> H <sub>22</sub> N <sub>1</sub> O <sub>6</sub>  | 17 | 22 | 1 | 6  |
| C <sub>17</sub> H <sub>28</sub> N <sub>1</sub> O <sub>9</sub>  | 17 | 28 | 1 | 9  |
| C <sub>17</sub> H <sub>27</sub> N <sub>1</sub> O <sub>12</sub> | 17 | 27 | 1 | 12 |
| C <sub>17</sub> H <sub>32</sub> N <sub>1</sub> O <sub>13</sub> | 17 | 32 | 1 | 13 |
| C <sub>17</sub> H <sub>34</sub> N <sub>1</sub> O <sub>13</sub> | 17 | 34 | 1 | 13 |
| C <sub>17</sub> H <sub>34</sub> N <sub>1</sub> O <sub>14</sub> | 17 | 34 | 1 | 14 |
| C <sub>17</sub> H <sub>27</sub> N <sub>1</sub> O <sub>15</sub> | 17 | 27 | 1 | 15 |
| C <sub>17</sub> H <sub>34</sub> N <sub>1</sub> O <sub>15</sub> | 17 | 34 | 1 | 15 |
| C <sub>17</sub> H <sub>28</sub> N <sub>2</sub> O <sub>9</sub>  | 17 | 28 | 2 | 9  |
| C <sub>17</sub> H <sub>26</sub> N <sub>2</sub> O <sub>12</sub> | 17 | 26 | 2 | 12 |
| C <sub>17</sub> H <sub>26</sub> N <sub>2</sub> O <sub>13</sub> | 17 | 26 | 2 | 13 |
| C <sub>17</sub> H <sub>28</sub> N <sub>2</sub> O <sub>13</sub> | 17 | 28 | 2 | 13 |
| C <sub>17</sub> H <sub>26</sub> N <sub>2</sub> O <sub>14</sub> | 17 | 26 | 2 | 14 |
| C <sub>17</sub> H <sub>26</sub> N <sub>2</sub> O <sub>15</sub> | 17 | 26 | 2 | 15 |
| C <sub>17</sub> H <sub>26</sub> N <sub>2</sub> O <sub>16</sub> | 17 | 26 | 2 | 16 |
| C <sub>17</sub> H <sub>26</sub> N <sub>2</sub> O <sub>17</sub> | 17 | 26 | 2 | 17 |
| C <sub>17</sub> H <sub>26</sub> N <sub>2</sub> O <sub>18</sub> | 17 | 26 | 2 | 18 |
| C <sub>18</sub> H <sub>27</sub> N <sub>1</sub> O <sub>5</sub>  | 18 | 27 | 1 | 5  |
| C <sub>18</sub> H <sub>31</sub> N <sub>1</sub> O <sub>7</sub>  | 18 | 31 | 1 | 7  |
| C <sub>18</sub> H <sub>31</sub> N <sub>1</sub> O <sub>8</sub>  | 18 | 31 | 1 | 8  |
| C <sub>18</sub> H <sub>27</sub> N <sub>1</sub> O <sub>10</sub> | 18 | 27 | 1 | 10 |
| C <sub>18</sub> H <sub>28</sub> N <sub>1</sub> O <sub>13</sub> | 18 | 28 | 1 | 13 |
| C <sub>18</sub> H <sub>32</sub> N <sub>1</sub> O <sub>14</sub> | 18 | 32 | 1 | 14 |
| C <sub>18</sub> H <sub>34</sub> N <sub>1</sub> O <sub>14</sub> | 18 | 34 | 1 | 14 |
| C <sub>18</sub> H <sub>36</sub> N <sub>1</sub> O <sub>14</sub> | 18 | 36 | 1 | 14 |
| C <sub>18</sub> H <sub>29</sub> N <sub>1</sub> O <sub>15</sub> | 18 | 29 | 1 | 15 |
| C <sub>18</sub> H <sub>34</sub> N <sub>1</sub> O <sub>15</sub> | 18 | 34 | 1 | 15 |
| C <sub>18</sub> H <sub>36</sub> N <sub>1</sub> O <sub>15</sub> | 18 | 36 | 1 | 15 |
| C <sub>18</sub> H <sub>35</sub> N <sub>1</sub> O               | 18 | 35 | 1 | 1  |
| C <sub>18</sub> H <sub>34</sub> N <sub>2</sub> O <sub>5</sub>  | 18 | 34 | 2 | 5  |
| C <sub>18</sub> H <sub>30</sub> N <sub>2</sub> O <sub>7</sub>  | 18 | 30 | 2 | 7  |
| C <sub>18</sub> H <sub>28</sub> N <sub>2</sub> O <sub>11</sub> | 18 | 28 | 2 | 11 |
| C <sub>18</sub> H <sub>28</sub> N <sub>2</sub> O <sub>12</sub> | 18 | 28 | 2 | 12 |
| C <sub>18</sub> H <sub>29</sub> N <sub>3</sub> O <sub>13</sub> | 18 | 29 | 3 | 13 |
| C <sub>18</sub> H <sub>29</sub> N <sub>3</sub> O <sub>14</sub> | 18 | 29 | 3 | 14 |
| C <sub>19</sub> H <sub>41</sub> N <sub>1</sub> O <sub>2</sub>  | 19 | 41 | 1 | 2  |
| C <sub>19</sub> H <sub>38</sub> N <sub>1</sub> O <sub>3</sub>  | 19 | 38 | 1 | 3  |
| C <sub>19</sub> H <sub>29</sub> N <sub>1</sub> O <sub>4</sub>  | 19 | 29 | 1 | 4  |
| C <sub>19</sub> H <sub>29</sub> N <sub>1</sub> O <sub>5</sub>  | 19 | 29 | 1 | 5  |
| C <sub>19</sub> H <sub>33</sub> N <sub>1</sub> O <sub>5</sub>  | 19 | 33 | 1 | 5  |
| C <sub>19</sub> H <sub>29</sub> N <sub>1</sub> O <sub>6</sub>  | 19 | 29 | 1 | 6  |
| C <sub>19</sub> H <sub>33</sub> N <sub>1</sub> O <sub>6</sub>  | 19 | 33 | 1 | 6  |
| C <sub>19</sub> H <sub>31</sub> N <sub>1</sub> O <sub>7</sub>  | 19 | 31 | 1 | 7  |
| C <sub>19</sub> H <sub>33</sub> N <sub>1</sub> O <sub>7</sub>  | 19 | 33 | 1 | 7  |

|                         |    |    |   |    |
|-------------------------|----|----|---|----|
| $C_{19}H_{35}N_1O_7$    | 19 | 35 | 1 | 7  |
| $C_{19}H_{33}N_1O_8$    | 19 | 33 | 1 | 8  |
| $C_{19}H_{35}N_1O_8$    | 19 | 35 | 1 | 8  |
| $C_{19}H_{29}N_1O_{10}$ | 19 | 29 | 1 | 10 |
| $C_{19}H_{31}N_1O_{10}$ | 19 | 31 | 1 | 10 |
| $C_{19}H_{29}N_1O_{11}$ | 19 | 29 | 1 | 11 |
| $C_{19}H_{31}N_1O_{11}$ | 19 | 31 | 1 | 11 |
| $C_{19}H_{29}N_1O_{12}$ | 19 | 29 | 1 | 12 |
| $C_{19}H_{31}N_1O_{12}$ | 19 | 31 | 1 | 12 |
| $C_{19}H_{29}N_1O_{13}$ | 19 | 29 | 1 | 13 |
| $C_{19}H_{31}N_1O_{13}$ | 19 | 31 | 1 | 13 |
| $C_{19}H_{31}N_1O_{14}$ | 19 | 31 | 1 | 14 |
| $C_{19}H_{38}N_1O_{14}$ | 19 | 38 | 1 | 14 |
| $C_{19}H_{31}N_1O_{15}$ | 19 | 31 | 1 | 15 |
| $C_{19}H_{38}N_1O_{15}$ | 19 | 38 | 1 | 15 |
| $C_{19}H_{38}N_1O_{16}$ | 19 | 38 | 1 | 16 |
| $C_{19}H_{30}N_1O_{17}$ | 19 | 30 | 1 | 17 |
| $C_{19}H_{36}N_1O_{17}$ | 19 | 36 | 1 | 17 |
| $C_{19}H_{24}N_2O_2$    | 19 | 24 | 2 | 2  |
| $C_{19}H_{34}N_2O_8$    | 19 | 34 | 2 | 8  |
| $C_{19}H_{30}N_2O_{10}$ | 19 | 30 | 2 | 10 |
| $C_{19}H_{30}N_2O_{11}$ | 19 | 30 | 2 | 11 |
| $C_{19}H_{30}N_2O_{12}$ | 19 | 30 | 2 | 12 |
| $C_{19}H_{30}N_2O_{13}$ | 19 | 30 | 2 | 13 |
| $C_{19}H_{30}N_2O_{14}$ | 19 | 30 | 2 | 14 |
| $C_{19}H_{32}N_2O_{14}$ | 19 | 32 | 2 | 14 |
| $C_{19}H_{30}N_2O_{15}$ | 19 | 30 | 2 | 15 |
| $C_{19}H_{30}N_2O_{16}$ | 19 | 30 | 2 | 16 |
| $C_{19}H_{30}N_2O_{17}$ | 19 | 30 | 2 | 17 |
| $C_{19}H_{30}N_2O_{18}$ | 19 | 30 | 2 | 18 |
| $C_{19}H_{30}N_2O_{19}$ | 19 | 30 | 2 | 19 |
| $C_{19}H_{31}N_3O_{15}$ | 19 | 31 | 3 | 15 |
| $C_{19}H_{31}N_3O_{16}$ | 19 | 31 | 3 | 16 |
| $C_{19}H_{31}N_3O_{17}$ | 19 | 31 | 3 | 17 |
| $C_{19}H_{31}N_3O_{18}$ | 19 | 31 | 3 | 18 |
| $C_{19}H_{31}N_3O_{19}$ | 19 | 31 | 3 | 19 |
| $C_{19}H_{30}N_4O_{13}$ | 19 | 30 | 4 | 13 |
| $C_{19}H_{30}N_4O_{15}$ | 19 | 30 | 4 | 15 |
| $C_{19}H_{31}N_5O_{17}$ | 19 | 31 | 5 | 17 |
| $C_{19}H_{31}N_5O_{18}$ | 19 | 31 | 5 | 18 |
| $C_{19}H_{31}N_5O_{19}$ | 19 | 31 | 5 | 19 |
| $C_{20}H_{31}N_1O_4$    | 20 | 31 | 1 | 4  |
| $C_{20}H_{31}N_1O_5$    | 20 | 31 | 1 | 5  |
| $C_{20}H_{35}N_1O_5$    | 20 | 35 | 1 | 5  |

|                         |    |    |   |    |
|-------------------------|----|----|---|----|
| $C_{20}H_{31}N_1O_6$    | 20 | 31 | 1 | 6  |
| $C_{20}H_{33}N_1O_6$    | 20 | 33 | 1 | 6  |
| $C_{20}H_{35}N_1O_6$    | 20 | 35 | 1 | 6  |
| $C_{20}H_{31}N_1O_7$    | 20 | 31 | 1 | 7  |
| $C_{20}H_{33}N_1O_7$    | 20 | 33 | 1 | 7  |
| $C_{20}H_{35}N_1O_7$    | 20 | 35 | 1 | 7  |
| $C_{20}H_{37}N_1O_7$    | 20 | 37 | 1 | 7  |
| $C_{20}H_{31}N_1O_8$    | 20 | 31 | 1 | 8  |
| $C_{20}H_{33}N_1O_8$    | 20 | 33 | 1 | 8  |
| $C_{20}H_{31}N_1O_9$    | 20 | 31 | 1 | 9  |
| $C_{20}H_{33}N_1O_9$    | 20 | 33 | 1 | 9  |
| $C_{20}H_{39}N_1O_9$    | 20 | 39 | 1 | 9  |
| $C_{20}H_{31}N_1O_{10}$ | 20 | 31 | 1 | 10 |
| $C_{20}H_{31}N_1O_{11}$ | 20 | 31 | 1 | 11 |
| $C_{20}H_{31}N_1O_{12}$ | 20 | 31 | 1 | 12 |
| $C_{20}H_{33}N_1O_{12}$ | 20 | 33 | 1 | 12 |
| $C_{20}H_{31}N_1O_{13}$ | 20 | 31 | 1 | 13 |
| $C_{20}H_{40}N_1O_{14}$ | 20 | 40 | 1 | 14 |
| $C_{20}H_{31}N_1O_{15}$ | 20 | 31 | 1 | 15 |
| $C_{20}H_{33}N_1O_{15}$ | 20 | 33 | 1 | 15 |
| $C_{20}H_{38}N_1O_{15}$ | 20 | 38 | 1 | 15 |
| $C_{20}H_{40}N_1O_{15}$ | 20 | 40 | 1 | 15 |
| $C_{20}H_{33}N_1O_{16}$ | 20 | 33 | 1 | 16 |
| $C_{20}H_{38}N_1O_{16}$ | 20 | 38 | 1 | 16 |
| $C_{20}H_{40}N_1O_{16}$ | 20 | 40 | 1 | 16 |
| $C_{20}H_{32}N_2O_8$    | 20 | 32 | 2 | 8  |
| $C_{20}H_{34}N_2O_8$    | 20 | 34 | 2 | 8  |
| $C_{20}H_{30}N_2O_9$    | 20 | 30 | 2 | 9  |
| $C_{20}H_{32}N_2O_9$    | 20 | 32 | 2 | 9  |
| $C_{20}H_{32}N_2O_{10}$ | 20 | 32 | 2 | 10 |
| $C_{20}H_{32}N_2O_{11}$ | 20 | 32 | 2 | 11 |
| $C_{20}H_{34}N_2O_{11}$ | 20 | 34 | 2 | 11 |
| $C_{20}H_{30}N_2O_{12}$ | 20 | 30 | 2 | 12 |
| $C_{20}H_{32}N_2O_{12}$ | 20 | 32 | 2 | 12 |
| $C_{20}H_{30}N_2O_{13}$ | 20 | 30 | 2 | 13 |
| $C_{20}H_{31}N_2O_{13}$ | 20 | 31 | 2 | 13 |
| $C_{20}H_{32}N_2O_{13}$ | 20 | 32 | 2 | 13 |
| $C_{20}H_{30}N_2O_{14}$ | 20 | 30 | 2 | 14 |
| $C_{20}H_{31}N_2O_{14}$ | 20 | 31 | 2 | 14 |
| $C_{20}H_{32}N_2O_{14}$ | 20 | 32 | 2 | 14 |
| $C_{20}H_{30}N_2O_{15}$ | 20 | 30 | 2 | 15 |
| $C_{20}H_{31}N_2O_{15}$ | 20 | 31 | 2 | 15 |
| $C_{20}H_{32}N_2O_{15}$ | 20 | 32 | 2 | 15 |
| $C_{20}H_{30}N_2O_{16}$ | 20 | 30 | 2 | 16 |

|                         |    |    |   |    |
|-------------------------|----|----|---|----|
| $C_{20}H_{31}N_2O_{16}$ | 20 | 31 | 2 | 16 |
| $C_{20}H_{32}N_2O_{16}$ | 20 | 32 | 2 | 16 |
| $C_{20}H_{30}N_2O_{17}$ | 20 | 30 | 2 | 17 |
| $C_{20}H_{32}N_2O_{17}$ | 20 | 32 | 2 | 17 |
| $C_{20}H_{32}N_2O_{18}$ | 20 | 32 | 2 | 18 |
| $C_{20}H_{32}N_2O_{19}$ | 20 | 32 | 2 | 19 |
| $C_{20}H_{32}N_2O_{20}$ | 20 | 32 | 2 | 20 |
| $C_{20}H_{31}N_3O_{12}$ | 20 | 31 | 3 | 12 |
| $C_{20}H_{33}N_3O_{12}$ | 20 | 33 | 3 | 12 |
| $C_{20}H_{31}N_3O_{13}$ | 20 | 31 | 3 | 13 |
| $C_{20}H_{33}N_3O_{13}$ | 20 | 33 | 3 | 13 |
| $C_{20}H_{31}N_3O_{14}$ | 20 | 31 | 3 | 14 |
| $C_{20}H_{33}N_3O_{14}$ | 20 | 33 | 3 | 14 |
| $C_{20}H_{31}N_3O_{15}$ | 20 | 31 | 3 | 15 |
| $C_{20}H_{33}N_3O_{15}$ | 20 | 33 | 3 | 15 |
| $C_{20}H_{31}N_3O_{16}$ | 20 | 31 | 3 | 16 |
| $C_{20}H_{32}N_3O_{16}$ | 20 | 32 | 3 | 16 |
| $C_{20}H_{33}N_3O_{16}$ | 20 | 33 | 3 | 16 |
| $C_{20}H_{31}N_3O_{17}$ | 20 | 31 | 3 | 17 |
| $C_{20}H_{32}N_3O_{17}$ | 20 | 32 | 3 | 17 |
| $C_{20}H_{33}N_3O_{17}$ | 20 | 33 | 3 | 17 |
| $C_{20}H_{31}N_3O_{18}$ | 20 | 31 | 3 | 18 |
| $C_{20}H_{32}N_3O_{18}$ | 20 | 32 | 3 | 18 |
| $C_{20}H_{33}N_3O_{18}$ | 20 | 33 | 3 | 18 |
| $C_{20}H_{31}N_3O_{19}$ | 20 | 31 | 3 | 19 |
| $C_{20}H_{32}N_3O_{19}$ | 20 | 32 | 3 | 19 |
| $C_{20}H_{33}N_3O_{19}$ | 20 | 33 | 3 | 19 |
| $C_{20}H_{31}N_3O_{20}$ | 20 | 31 | 3 | 20 |
| $C_{20}H_{33}N_3O_{20}$ | 20 | 33 | 3 | 20 |
| $C_{20}H_{31}N_3O_{21}$ | 20 | 31 | 3 | 21 |
| $C_{20}H_{30}N_4O_{14}$ | 20 | 30 | 4 | 14 |
| $C_{20}H_{30}N_4O_{15}$ | 20 | 30 | 4 | 15 |
| $C_{20}H_{34}N_4O_{15}$ | 20 | 34 | 4 | 15 |
| $C_{20}H_{30}N_4O_{16}$ | 20 | 30 | 4 | 16 |
| $C_{20}H_{34}N_4O_{16}$ | 20 | 34 | 4 | 16 |
| $C_{20}H_{30}N_4O_{17}$ | 20 | 30 | 4 | 17 |
| $C_{20}H_{34}N_4O_{17}$ | 20 | 34 | 4 | 17 |
| $C_{20}H_{30}N_4O_{18}$ | 20 | 30 | 4 | 18 |
| $C_{20}H_{34}N_4O_{18}$ | 20 | 34 | 4 | 18 |
| $C_{20}H_{30}N_4O_{19}$ | 20 | 30 | 4 | 19 |
| $C_{20}H_{34}N_4O_{19}$ | 20 | 34 | 4 | 19 |
| $C_{20}H_{30}N_4O_{20}$ | 20 | 30 | 4 | 20 |
| $C_{20}H_{34}N_4O_{20}$ | 20 | 34 | 4 | 20 |
| $C_{20}H_{30}N_4O_{21}$ | 20 | 30 | 4 | 21 |

|                         |    |    |   |    |
|-------------------------|----|----|---|----|
| $C_{20}H_{30}N_4O_{22}$ | 20 | 30 | 4 | 22 |
| $C_{21}H_{35}N_1O_7$    | 21 | 35 | 1 | 7  |
| $C_{21}H_{35}N_1O_8$    | 21 | 35 | 1 | 8  |
| $C_{21}H_{23}N_1O_{10}$ | 21 | 23 | 1 | 10 |
| $C_{21}H_{40}N_1O_{14}$ | 21 | 40 | 1 | 14 |
| $C_{21}H_{40}N_1O_{15}$ | 21 | 40 | 1 | 15 |
| $C_{21}H_{42}N_1O_{15}$ | 21 | 42 | 1 | 15 |
| $C_{22}H_{44}N_1O_{14}$ | 22 | 44 | 1 | 14 |
| $C_{22}H_{30}N_1O_{15}$ | 22 | 30 | 1 | 15 |
| $C_{24}H_{36}N_1O_9$    | 24 | 36 | 1 | 9  |
| $C_{25}H_{32}N_2O_5$    | 25 | 32 | 2 | 5  |
| $C_{25}H_{28}N_2O_{13}$ | 25 | 28 | 2 | 13 |
| $C_{26}H_{34}N_2O_4$    | 26 | 34 | 2 | 4  |
| $C_{26}H_{34}N_2O_5$    | 26 | 34 | 2 | 5  |
| $C_{26}H_{47}N_3O_{20}$ | 26 | 47 | 3 | 20 |
| $C_{26}H_{47}N_5O_{25}$ | 26 | 47 | 5 | 25 |
| $C_{27}H_{34}N_2O_4$    | 27 | 34 | 2 | 4  |
| $C_{27}H_{36}N_2O_4$    | 27 | 36 | 2 | 4  |
| $C_{27}H_{36}N_2O_5$    | 27 | 36 | 2 | 5  |
| $C_{27}H_{24}N_2O_6$    | 27 | 24 | 2 | 6  |
| $C_{27}H_{44}N_6O_{16}$ | 27 | 44 | 6 | 16 |
| $C_{28}H_{43}N_1O_{18}$ | 28 | 43 | 1 | 18 |
| $C_{28}H_{38}N_2O_4$    | 28 | 38 | 2 | 4  |
| $C_{28}H_{38}N_2O_5$    | 28 | 38 | 2 | 5  |
| $C_{28}H_{44}N_2O_{16}$ | 28 | 44 | 2 | 16 |
| $C_{28}H_{45}N_5O_{16}$ | 28 | 45 | 5 | 16 |
| $C_{28}H_{45}N_5O_{17}$ | 28 | 45 | 5 | 17 |
| $C_{28}H_{43}N_5O_{22}$ | 28 | 43 | 5 | 22 |
| $C_{29}H_{44}N_2O_{22}$ | 29 | 44 | 2 | 22 |
| $C_{29}H_{47}N_3O_{19}$ | 29 | 47 | 3 | 19 |
| $C_{29}H_{45}N_3O_{20}$ | 29 | 45 | 3 | 20 |
| $C_{29}H_{47}N_3O_{21}$ | 29 | 47 | 3 | 21 |
| $C_{29}H_{48}N_4O_{18}$ | 29 | 48 | 4 | 18 |
| $C_{29}H_{46}N_4O_{19}$ | 29 | 46 | 4 | 19 |
| $C_{29}H_{46}N_4O_{20}$ | 29 | 46 | 4 | 20 |
| $C_{29}H_{46}N_4O_{22}$ | 29 | 46 | 4 | 22 |
| $C_{29}H_{46}N_4O_{23}$ | 29 | 46 | 4 | 23 |
| $C_{29}H_{46}N_4O_{24}$ | 29 | 46 | 4 | 24 |
| $C_{30}H_{47}N_1O_{18}$ | 30 | 47 | 1 | 18 |
| $C_{30}H_{47}N_1O_{19}$ | 30 | 47 | 1 | 19 |
| $C_{30}H_{48}N_2O_{18}$ | 30 | 48 | 2 | 18 |
| $C_{30}H_{46}N_2O_{22}$ | 30 | 46 | 2 | 22 |
| $C_{30}H_{48}N_2O_{23}$ | 30 | 48 | 2 | 23 |
| $C_{30}H_{47}N_3O_{18}$ | 30 | 47 | 3 | 18 |



|                         |    |    |   |    |
|-------------------------|----|----|---|----|
| $C_{30}H_{49}N_3O_{18}$ | 30 | 49 | 3 | 18 |
| $C_{30}H_{47}N_3O_{19}$ | 30 | 47 | 3 | 19 |
| $C_{30}H_{49}N_3O_{20}$ | 30 | 49 | 3 | 20 |
| $C_{30}H_{47}N_3O_{21}$ | 30 | 47 | 3 | 21 |
| $C_{30}H_{49}N_3O_{22}$ | 30 | 49 | 3 | 22 |
| $C_{30}H_{47}N_3O_{23}$ | 30 | 47 | 3 | 23 |
| $C_{30}H_{47}N_3O_{24}$ | 30 | 47 | 3 | 24 |
| $C_{30}H_{48}N_4O_{16}$ | 30 | 48 | 4 | 16 |
| $C_{30}H_{48}N_4O_{17}$ | 30 | 48 | 4 | 17 |
| $C_{30}H_{48}N_4O_{18}$ | 30 | 48 | 4 | 18 |
| $C_{30}H_{48}N_4O_{19}$ | 30 | 48 | 4 | 19 |
| $C_{30}H_{48}N_4O_{20}$ | 30 | 48 | 4 | 20 |
| $C_{30}H_{48}N_4O_{21}$ | 30 | 48 | 4 | 21 |
| $C_{30}H_{48}N_4O_{22}$ | 30 | 48 | 4 | 22 |
| $C_{30}H_{48}N_4O_{23}$ | 30 | 48 | 4 | 23 |
| $C_{30}H_{48}N_4O_{24}$ | 30 | 48 | 4 | 24 |
| $C_{30}H_{49}N_5O_{20}$ | 30 | 49 | 5 | 20 |

<sup>a</sup>The molecular formulas were summarized from previous studies (Shen et al., 2022; Guo et al., 2022b; Draper et al., 2015; Pullinen et al., 2020; Guo et al., 2022a; Shen et al., 2021; Xu et al., 2021a; Devault and Ziemann, 2021).

**Table S4.** The potential reactions in the precursor-product pair analysis.

| NOCs  | Reaction type | Specific reaction <sup>a</sup>                   | Variation of atoms         |
|-------|---------------|--------------------------------------------------|----------------------------|
| CHON+ | Cond_N        | Imination reaction                               | +NH-O                      |
|       |               | Intramolecular N-heterocyclic reaction           | +N-HO <sub>2</sub>         |
|       | Hy_N          | Hydrolysis reaction                              | +O-NH, +HO <sub>2</sub> -N |
|       | De_N          | Dehydration reaction                             | -H <sub>2</sub> O          |
|       | Cond_hy_N     | Mixed processes containing cond_N and hy_N       | -                          |
|       | Cond_de_N     | Mixed processes containing cond_N and de_N       | -                          |
|       | Hy_de_N       | Mixed processes containing hy_N and de_N         | -                          |
|       | Cond_hy_de_N  | Mixed processes containing cond_N, hy_N and de_N | -                          |
|       | Unknown_N     | Unrecognized processes                           | -                          |
| CHN+  | Cond_N        | Intramolecular N-heterocyclic pathway            | +N-HO <sub>2</sub>         |
|       | De_N          | Dehydration reaction                             | -H <sub>2</sub> O          |
|       | Cond_de_N     | Mixed processes containing cond_N and de_N       | -                          |
|       | Unknown_N     | Unrecognized processes                           | -                          |
| CHON- | Ox_N          | Oxidation reaction                               | -H+NO <sub>2</sub>         |
|       | Hy_N          | Hydrolysis reaction                              | +H-NO <sub>2</sub>         |
|       | Ox_hy_N       | Mixed processes containing ox_N and hy_N         | -                          |
|       | Unknown_N     | Unrecognized processes                           | -                          |

<sup>a</sup>The reactions were summarized from published publications (Abudumutailifu et al., 2024; Liu et al., 2023b; Jiang et al., 2023; Lv et al., 2022; Su et al., 2021; Laskin et al., 2014; Kames et al., 1993).

**Table S5.** The stress values obtained from the two-dimensional NMDS ordination analysis for different NOCs in different cities.

| City | NOCs  | Stress values |
|------|-------|---------------|
| HEB  | CHON+ | 0.037         |
|      | CHN+  | 0.039         |
|      | CHON- | 0.066         |
| BJ   | CHON+ | 0.046         |
|      | CHN+  | 0.031         |
|      | CHON- | 0.028         |
| HZ   | CHON+ | 0.113         |
|      | CHN+  | 0.067         |
|      | CHON- | 0.077         |

**Table S6.** The number of compounds in different subgroups, as well as the number fractions and signal intensity fractions of each subgroup in different cities in different periods in ESI<sup>-</sup> mode.

| City | Class                      | All period  |                  |                            | Clean period |                  |                            | Haze period |                  |                            | Percentage                           |
|------|----------------------------|-------------|------------------|----------------------------|--------------|------------------|----------------------------|-------------|------------------|----------------------------|--------------------------------------|
|      |                            | Number      | Number frac. (%) | Signal intensity frac. (%) | Number       | Number frac. (%) | Signal intensity frac. (%) | Number      | Number frac. (%) | Signal intensity frac. (%) | Percentage increase (%) <sup>a</sup> |
| HEB  | <b>CHO+</b>                | <b>528</b>  | <b>28.2</b>      | <b>10.3</b>                | <b>524</b>   | <b>28.2</b>      | <b>13.0</b>                | <b>516</b>  | <b>28.3</b>      | <b>9.5</b>                 | <b>240.7</b>                         |
|      | <b>CHON<sub>1-3+</sub></b> | <b>713</b>  | <b>38.1</b>      | <b>21.5</b>                | <b>702</b>   | <b>37.8</b>      | <b>23.7</b>                | <b>686</b>  | <b>37.6</b>      | <b>20.8</b>                | <b>307.4</b>                         |
|      | CHON <sub>1+</sub>         | 414         | 22.1             | 17.1                       | 408          | 22.0             | 18.2                       | 398         | 21.8             | 16.8                       | 327.5                                |
|      | CHON <sub>2+</sub>         | 179         | 9.6              | 1.9                        | 176          | 9.5              | 1.7                        | 171         | 9.4              | 1.9                        | 421.0                                |
|      | CHON <sub>3+</sub>         | 120         | 6.4              | 2.6                        | 118          | 6.4              | 3.9                        | 117         | 6.4              | 2.2                        | 162.7                                |
|      | <b>CHN<sub>1-3+</sub></b>  | <b>633</b>  | <b>33.8</b>      | <b>68.2</b>                | <b>630</b>   | <b>33.9</b>      | <b>63.3</b>                | <b>622</b>  | <b>34.1</b>      | <b>69.6</b>                | <b>410.3</b>                         |
|      | CHN <sub>1+</sub>          | 448         | 23.9             | 61.1                       | 447          | 24.1             | 57.1                       | 439         | 24.1             | 62.3                       | 405.9                                |
|      | CHN <sub>2+</sub>          | 173         | 9.2              | 7.0                        | 171          | 9.2              | 6.2                        | 171         | 9.4              | 7.3                        | 448.7                                |
|      | CHN <sub>3+</sub>          | 12          | 0.6              | 0.1                        | 12           | 0.7              | 0.0                        | 12          | 0.7              | 0.1                        | 795.0                                |
|      | <b>Re-NOCs<sup>b</sup></b> | <b>1346</b> | <b>71.8</b>      | <b>89.7</b>                | <b>1332</b>  | <b>71.8</b>      | <b>87.0</b>                | <b>1308</b> | <b>71.7</b>      | <b>90.5</b>                | <b>382.2</b>                         |
|      | <b>ALL ESI+</b>            | <b>1874</b> | <b>100.0</b>     | <b>100.0</b>               | <b>1856</b>  | <b>100.0</b>     | <b>100.0</b>               | <b>1824</b> | <b>100.0</b>     | <b>100.0</b>               | <b>363.9</b>                         |
| BJ   | <b>CHO+</b>                | <b>533</b>  | <b>28.1</b>      | <b>23.6</b>                | <b>530</b>   | <b>28.1</b>      | <b>26.5</b>                | <b>524</b>  | <b>28.5</b>      | <b>20.4</b>                | <b>43.0</b>                          |
|      | <b>CHON<sub>1-3+</sub></b> | <b>727</b>  | <b>38.4</b>      | <b>31.6</b>                | <b>725</b>   | <b>38.4</b>      | <b>34.8</b>                | <b>694</b>  | <b>37.7</b>      | <b>28.1</b>                | <b>49.9</b>                          |
|      | CHON <sub>1+</sub>         | 421         | 22.2             | 25.7                       | 419          | 22.2             | 29.8                       | 403         | 21.9             | 21.3                       | 33.1                                 |
|      | CHON <sub>2+</sub>         | 184         | 9.7              | 3.0                        | 184          | 9.8              | 2.9                        | 175         | 9.5              | 3.2                        | 106.2                                |
|      | CHON <sub>3+</sub>         | 122         | 6.4              | 2.8                        | 122          | 6.5              | 2.1                        | 116         | 6.3              | 3.5                        | 213.2                                |
|      | <b>CHN<sub>1-3+</sub></b>  | <b>634</b>  | <b>33.5</b>      | <b>44.9</b>                | <b>631</b>   | <b>33.5</b>      | <b>38.7</b>                | <b>621</b>  | <b>33.8</b>      | <b>51.6</b>                | <b>148.0</b>                         |
|      | CHN <sub>1+</sub>          | 448         | 23.7             | 36.0                       | 445          | 23.6             | 30.5                       | 438         | 23.8             | 41.9                       | 155.5                                |
|      | CHN <sub>2+</sub>          | 174         | 9.2              | 8.6                        | 174          | 9.2              | 7.7                        | 171         | 9.3              | 9.5                        | 127.6                                |
|      | CHN <sub>3+</sub>          | 12          | 0.6              | 0.3                        | 12           | 0.6              | 0.5                        | 12          | 0.7              | 0.2                        | -9.5                                 |
|      | <b>Re-NOCs</b>             | <b>1361</b> | <b>71.9</b>      | <b>76.4</b>                | <b>1356</b>  | <b>71.9</b>      | <b>73.5</b>                | <b>1315</b> | <b>71.5</b>      | <b>79.6</b>                | <b>101.6</b>                         |
|      | <b>ALL ESI+</b>            | <b>1894</b> | <b>100.0</b>     | <b>100.0</b>               | <b>1886</b>  | <b>100.0</b>     | <b>100.0</b>               | <b>1839</b> | <b>100.0</b>     | <b>100.0</b>               | <b>86.0</b>                          |

|    |                            |             |              |              |             |              |              |             |              |              |              |
|----|----------------------------|-------------|--------------|--------------|-------------|--------------|--------------|-------------|--------------|--------------|--------------|
|    | <b>CHO+</b>                | <b>531</b>  | <b>28.3</b>  | <b>34.1</b>  | <b>524</b>  | <b>28.4</b>  | <b>39.6</b>  | <b>518</b>  | <b>28.2</b>  | <b>29.1</b>  | <b>-18.1</b> |
|    | <b>CHON<sub>1-3+</sub></b> | <b>715</b>  | <b>38.1</b>  | <b>35.0</b>  | <b>700</b>  | <b>37.9</b>  | <b>36.1</b>  | <b>697</b>  | <b>37.9</b>  | <b>34.0</b>  | <b>4.5</b>   |
|    | CHON <sub>1+</sub>         | 415         | 22.1         | 30.1         | 405         | 21.9         | 31.7         | 404         | 22.0         | 28.8         | 0.9          |
|    | CHON <sub>2+</sub>         | 180         | 9.6          | 3.2          | 177         | 9.6          | 3.1          | 175         | 9.5          | 3.3          | 18.2         |
|    | CHON <sub>3+</sub>         | 120         | 6.4          | 1.7          | 118         | 6.4          | 1.4          | 118         | 6.4          | 1.9          | 55.9         |
| HZ | <b>CHN<sub>1-3+</sub></b>  | <b>632</b>  | <b>33.7</b>  | <b>30.9</b>  | <b>624</b>  | <b>33.8</b>  | <b>24.3</b>  | <b>623</b>  | <b>33.9</b>  | <b>36.9</b>  | <b>69.3</b>  |
|    | CHN <sub>1+</sub>          | 445         | 23.7         | 23.7         | 437         | 23.7         | 17.8         | 438         | 23.8         | 29.0         | 81.5         |
|    | CHN <sub>2+</sub>          | 175         | 9.3          | 6.9          | 175         | 9.5          | 6.1          | 173         | 9.4          | 7.6          | 38.6         |
|    | CHN <sub>3+</sub>          | 12          | 0.6          | 0.3          | 12          | 0.7          | 0.4          | 12          | 0.7          | 0.3          | -8.6         |
|    | <b>Re-NOCs</b>             | <b>1347</b> | <b>71.7</b>  | <b>65.9</b>  | <b>1324</b> | <b>71.7</b>  | <b>60.4</b>  | <b>1320</b> | <b>71.8</b>  | <b>70.9</b>  | <b>30.5</b>  |
|    | <b>ALL ESI+</b>            | <b>1878</b> | <b>100.0</b> | <b>100.0</b> | <b>1848</b> | <b>100.0</b> | <b>100.0</b> | <b>1838</b> | <b>100.0</b> | <b>100.0</b> | <b>11.3</b>  |

<sup>a</sup>It indicates the percentage increase in signal intensities of each group from clean to haze periods.

<sup>b</sup>Reduced NOCs (Re-NOCs) indicate the sum of CHN<sub>1-3+</sub> and CHON<sub>1-3+</sub> compounds.

**Table S7.** The number of compounds in different subgroups, as well as the number fractions and signal intensity fractions of each subgroup in different cities in different periods in ESI<sup>-</sup> mode.

| City | Class                                 | All period |                  |                            | Clean period |                  |                            | Haze period |                  |                            | Percentage                           |
|------|---------------------------------------|------------|------------------|----------------------------|--------------|------------------|----------------------------|-------------|------------------|----------------------------|--------------------------------------|
|      |                                       | Number     | Number frac. (%) | Signal intensity frac. (%) | Number       | Number frac. (%) | Signal intensity frac. (%) | Number      | Number frac. (%) | Signal intensity frac. (%) | Percentage increase (%) <sup>a</sup> |
| HEB  | <b>CHO<sup>-</sup></b>                | <b>584</b> | <b>66.4</b>      | <b>48.2</b>                | <b>584</b>   | <b>66.4</b>      | <b>43.2</b>                | <b>568</b>  | <b>65.7</b>      | <b>51.8</b>                | <b>139.5</b>                         |
|      | <b>CHON<sub>1-3</sub><sup>-</sup></b> | <b>296</b> | <b>33.6</b>      | <b>51.8</b>                | <b>296</b>   | <b>33.6</b>      | <b>56.9</b>                | <b>296</b>  | <b>34.3</b>      | <b>48.2</b>                | <b>69.4</b>                          |
|      | CHON <sub>1</sub> <sup>-</sup>        | 190        | 21.6             | 48.0                       | 190          | 21.6             | 52.4                       | 190         | 22.0             | 45.0                       | 71.4                                 |
|      | CHON <sub>2</sub> <sup>-</sup>        | 72         | 8.2              | 2.1                        | 72           | 8.2              | 3.1                        | 72          | 8.3              | 1.5                        | -3.2                                 |
|      | CHON <sub>3</sub> <sup>-</sup>        | 34         | 3.9              | 1.6                        | 34           | 3.9              | 1.4                        | 34          | 3.9              | 1.8                        | 151.5                                |
|      | <b>ALL ESI<sup>-</sup></b>            | <b>880</b> | <b>100.0</b>     | <b>100.0</b>               | <b>880</b>   | <b>100.0</b>     | <b>100.0</b>               | <b>864</b>  | <b>100.0</b>     | <b>100.0</b>               | <b>99.6</b>                          |
| BJ   | <b>CHO<sup>-</sup></b>                | <b>589</b> | <b>66.3</b>      | <b>54.7</b>                | <b>586</b>   | <b>66.1</b>      | <b>52.7</b>                | <b>575</b>  | <b>66.0</b>      | <b>58.5</b>                | <b>15.3</b>                          |
|      | <b>CHON<sub>1-3</sub><sup>-</sup></b> | <b>300</b> | <b>33.8</b>      | <b>45.3</b>                | <b>300</b>   | <b>33.9</b>      | <b>47.3</b>                | <b>297</b>  | <b>34.1</b>      | <b>41.5</b>                | <b>-9.1</b>                          |
|      | CHON <sub>1</sub> <sup>-</sup>        | 193        | 21.7             | 37.9                       | 193          | 21.8             | 39.0                       | 191         | 21.9             | 35.8                       | -4.7                                 |
|      | CHON <sub>2</sub> <sup>-</sup>        | 73         | 8.2              | 5.9                        | 73           | 8.2              | 6.7                        | 72          | 8.3              | 4.4                        | -31.8                                |
|      | CHON <sub>3</sub> <sup>-</sup>        | 34         | 3.8              | 1.5                        | 34           | 3.9              | 1.6                        | 34          | 3.9              | 1.2                        | -21.9                                |
|      | <b>ALL ESI<sup>-</sup></b>            | <b>889</b> | <b>100.0</b>     | <b>100.0</b>               | <b>886</b>   | <b>100.0</b>     | <b>100.0</b>               | <b>872</b>  | <b>100.0</b>     | <b>100.0</b>               | <b>3.8</b>                           |
| HZ   | <b>CHO<sup>-</sup></b>                | <b>593</b> | <b>66.3</b>      | <b>67.7</b>                | <b>587</b>   | <b>66.2</b>      | <b>69.3</b>                | <b>589</b>  | <b>66.2</b>      | <b>66.1</b>                | <b>-5.8</b>                          |
|      | <b>CHON<sub>1-3</sub><sup>-</sup></b> | <b>301</b> | <b>33.7</b>      | <b>32.3</b>                | <b>300</b>   | <b>33.8</b>      | <b>30.7</b>                | <b>301</b>  | <b>33.8</b>      | <b>33.9</b>                | <b>8.9</b>                           |
|      | CHON <sub>1</sub> <sup>-</sup>        | 194        | 21.7             | 24.2                       | 194          | 21.9             | 22.7                       | 194         | 21.8             | 25.7                       | 11.7                                 |
|      | CHON <sub>2</sub> <sup>-</sup>        | 73         | 8.2              | 7.2                        | 72           | 8.1              | 7.0                        | 73          | 8.2              | 7.3                        | 3.3                                  |
|      | CHON <sub>3</sub> <sup>-</sup>        | 34         | 3.8              | 0.9                        | 34           | 3.8              | 1.0                        | 34          | 3.8              | 0.8                        | -14.1                                |
|      | <b>ALL ESI<sup>-</sup></b>            | <b>894</b> | <b>100.0</b>     | <b>100.0</b>               | <b>887</b>   | <b>100.0</b>     | <b>100.0</b>               | <b>890</b>  | <b>100.0</b>     | <b>100.0</b>               | <b>-1.3</b>                          |

<sup>a</sup>It indicates the percentage increase in signal intensities of each group from clean to haze periods.

**Table S8.** The signal intensity fractions of each subgroup of CHON+ and CHON− compounds in different cities in different periods.

| Mode  | City | Period | Aliphatics- | Heterocyclics- | Aromatics- | Isoprene- | Monoterpenes- | Aromatics- | Aliphatics- | Unclassified |
|-------|------|--------|-------------|----------------|------------|-----------|---------------|------------|-------------|--------------|
|       |      |        | derived     | derived        | derived    | derived   | derived       | derived    | derived     | Ox_NOCs      |
|       |      |        | Re_NOCs     | Re_NOCs        | Re_NOCs    | Ox_NOCs   | Ox_NOCs       | Ox_NOCs    | Ox_NOCs     |              |
|       |      |        | (%)         | (%)            | (%)        | (%)       | (%)           | (%)        | (%)         | (%)          |
| CHON+ | HEB  | All    | 3.3         | 2.8            | 72.9       | 0.1       | 0.1           | 14.6       | 5.2         | 1.0          |
|       |      | Clean  | 7.1         | 7.6            | 59.1       | 0.1       | 0.3           | 17.7       | 7.6         | 0.6          |
|       |      | Haze   | 2.0         | 1.2            | 77.7       | 0.1       | 0.0           | 13.5       | 4.4         | 1.1          |
|       | BJ   | All    | 20.8        | 20.8           | 33.0       | 0.3       | 0.5           | 14.7       | 9.6         | 0.4          |
|       |      | Clean  | 22.4        | 24.2           | 30.8       | 0.3       | 0.6           | 11.5       | 9.8         | 0.4          |
|       |      | Haze   | 18.7        | 16.1           | 35.9       | 0.2       | 0.4           | 19.0       | 9.3         | 0.3          |
|       | HZ   | All    | 27.5        | 22.7           | 23.0       | 0.5       | 0.7           | 11.8       | 13.6        | 0.2          |
|       |      | Clean  | 27.3        | 24.4           | 24.9       | 0.5       | 0.5           | 10.1       | 12.1        | 0.2          |
|       |      | Haze   | 27.7        | 21.1           | 21.3       | 0.5       | 0.9           | 13.3       | 15.0        | 0.2          |
| CHON− | HEB  | All    | 0.4         | 0.0            | 3.6        | 1.3       | 0.3           | 90.3       | 2.3         | 1.8          |
|       |      | Clean  | 0.3         | 0.0            | 2.9        | 0.7       | 0.2           | 91.0       | 1.9         | 3.0          |
|       |      | Haze   | 0.4         | 0.0            | 4.2        | 1.8       | 0.4           | 89.7       | 2.6         | 0.9          |
|       | BJ   | All    | 0.1         | 0.0            | 4.5        | 1.3       | 0.5           | 85.7       | 4.4         | 3.5          |
|       |      | Clean  | 0.1         | 0.0            | 4.4        | 1.3       | 0.5           | 84.9       | 5.0         | 3.8          |
|       |      | Haze   | 0.1         | 0.0            | 4.8        | 1.2       | 0.6           | 87.3       | 3.2         | 2.7          |
|       | HZ   | All    | 0.3         | 0.0            | 9.9        | 1.0       | 1.7           | 71.6       | 4.4         | 11.1         |
|       |      | Clean  | 0.1         | 0.0            | 8.8        | 1.1       | 1.6           | 69.7       | 6.2         | 12.6         |
|       |      | Haze   | 0.5         | 0.0            | 11.0       | 0.8       | 1.8           | 73.4       | 2.8         | 9.7          |

**Table S9.** The number of compounds in different subgroups, as well as the number fractions and signal intensity fractions of each subgroup in different cities in different periods in CHN+ compounds.

| City | Class             | All period |                     |                               | Clean period |                     |                               | Haze period |                     |                               | Percentage                              |
|------|-------------------|------------|---------------------|-------------------------------|--------------|---------------------|-------------------------------|-------------|---------------------|-------------------------------|-----------------------------------------|
|      |                   | Number     | Number<br>frac. (%) | Signal intensity<br>frac. (%) | Number       | Number<br>frac. (%) | Signal intensity<br>frac. (%) | Number      | Number<br>frac. (%) | Signal intensity<br>frac. (%) | Percentage<br>increase (%) <sup>a</sup> |
| HEB  | Aliphatic CHN+    | 98         | 7.2                 | 15.5                          | 97           | 7.6                 | 15.4                          | 97          | 7.1                 | 15.6                          | 373.7                                   |
|      | Monoaromatic CHN+ | 311        | 51.9                | 49.1                          | 309          | 49.5                | 49.1                          | 305         | 52.6                | 49.0                          | 442.3                                   |
|      | Polyaromatic CHN+ | 224        | 40.9                | 35.4                          | 224          | 42.9                | 35.6                          | 220         | 40.3                | 35.4                          | 379.8                                   |
|      | <b>All</b>        | <b>633</b> | <b>100.0</b>        | <b>100.0</b>                  | <b>630</b>   | <b>100.0</b>        | <b>100.0</b>                  | <b>622</b>  | <b>100.0</b>        | <b>100.0</b>                  | <b>410.3</b>                            |
| BJ   | Aliphatic CHN+    | 99         | 14.3                | 15.6                          | 99           | 11.6                | 15.7                          | 98          | 16.5                | 15.8                          | 251.7                                   |
|      | Monoaromatic CHN+ | 311        | 48.4                | 49.1                          | 310          | 54.9                | 49.1                          | 304         | 43.2                | 49.0                          | 95.4                                    |
|      | Polyaromatic CHN+ | 224        | 37.3                | 35.3                          | 222          | 33.5                | 35.2                          | 219         | 40.3                | 35.3                          | 198.2                                   |
|      | <b>All</b>        | <b>634</b> | <b>100.0</b>        | <b>100.0</b>                  | <b>631</b>   | <b>100.0</b>        | <b>100.0</b>                  | <b>621</b>  | <b>100.0</b>        | <b>100.0</b>                  | <b>148.0</b>                            |
| HZ   | Aliphatic CHN+    | 99         | 35.5                | 15.7                          | 99           | 32.6                | 15.9                          | 98          | 37.2                | 15.7                          | 93.2                                    |
|      | Monoaromatic CHN+ | 311        | 50.9                | 49.2                          | 308          | 54.5                | 49.4                          | 307         | 48.7                | 49.3                          | 51.2                                    |
|      | Polyaromatic CHN+ | 222        | 13.7                | 35.1                          | 217          | 12.9                | 34.8                          | 218         | 14.1                | 35.0                          | 85.3                                    |
|      | <b>All</b>        | <b>632</b> | <b>100.0</b>        | <b>100.0</b>                  | <b>624</b>   | <b>100.0</b>        | <b>100.0</b>                  | <b>623</b>  | <b>100.0</b>        | <b>100.0</b>                  | <b>69.3</b>                             |

<sup>a</sup>It indicates the percentage increase in signal intensities of each group from clean to haze periods.



**Table S10.** The peak intensity-weighted average MF<sub>w</sub>, MM<sub>w</sub>, elemental ratios, DBE<sub>w</sub>, and X<sub>Cw</sub> for different NOCs in different cities and different periods.

| City | Periods      | Subgroups | MF <sub>w</sub>                                                           | MM <sub>w</sub> | O/C <sub>w</sub> | H/C <sub>w</sub> | N/C <sub>w</sub> | O/N <sub>w</sub> | DBE <sub>w</sub> | X <sub>Cw</sub> | AI <sub>modw</sub> | OS <sub>Cw</sub> |
|------|--------------|-----------|---------------------------------------------------------------------------|-----------------|------------------|------------------|------------------|------------------|------------------|-----------------|--------------------|------------------|
| HEB  | All period   | CHON+     | C <sub>11.49</sub> H <sub>14.96</sub> O <sub>1.97</sub> N <sub>1.33</sub> | 203.1           | 0.2              | 1.3              | 0.1              | 1.4              | 5.7              | 2.6             | 0.4                | -0.9             |
|      |              | CHN+      | C <sub>13.19</sub> H <sub>13.27</sub> N <sub>1.11</sub>                   | 187.1           | – <sup>a</sup>   | 1.1              | 0.1              | –                | 8.1              | 2.7             | 0.6                | -1.1             |
|      |              | CHON–     | C <sub>7.84</sub> H <sub>8.65</sub> O <sub>3.86</sub> N <sub>1.1</sub>    | 180.0           | 0.5              | 1.1              | 0.2              | 3.6              | 5.1              | 2.4             | 0.6                | 0.0              |
|      | Clean period | CHON+     | C <sub>13.51</sub> H <sub>20.47</sub> O <sub>2.18</sub> N <sub>1.4</sub>  | 237.3           | 0.2              | 1.4              | 0.1              | 1.5              | 5.0              | 2.5             | 0.3                | -1.1             |
|      |              | CHN+      | C <sub>13.4</sub> H <sub>13.01</sub> N <sub>1.1</sub>                     | 189.3           | –                | 1.0              | 0.1              | –                | 8.5              | 2.7             | 0.6                | -1.0             |
|      |              | CHON–     | C <sub>8.14</sub> H <sub>9.26</sub> O <sub>3.87</sub> N <sub>1.1</sub>    | 184.4           | 0.5              | 1.1              | 0.2              | 3.6              | 5.1              | 2.4             | 0.6                | -0.1             |
|      | Haze period  | CHON+     | C <sub>10.8</sub> H <sub>13.07</sub> O <sub>1.9</sub> N <sub>1.3</sub>    | 191.3           | 0.2              | 1.2              | 0.1              | 1.4              | 5.9              | 2.7             | 0.5                | -0.8             |
|      |              | CHN+      | C <sub>13.13</sub> H <sub>13.34</sub> N <sub>1.11</sub>                   | 186.5           | –                | 1.1              | 0.1              | –                | 8.0              | 2.7             | 0.6                | -1.1             |
|      |              | CHON–     | C <sub>7.59</sub> H <sub>8.14</sub> O <sub>3.85</sub> N <sub>1.1</sub>    | 176.3           | 0.5              | 1.1              | 0.2              | 3.7              | 5.1              | 2.4             | 0.6                | 0.0              |
| BJ   | All period   | CHON+     | C <sub>16.48</sub> H <sub>29.49</sub> O <sub>1.98</sub> N <sub>1.27</sub> | 277.0           | 0.2              | 1.7              | 0.1              | 1.5              | 3.4              | 2.0             | 0.2                | -1.4             |
|      |              | CHN+      | C <sub>13.8</sub> H <sub>15.15</sub> N <sub>1.21</sub>                    | 197.8           | –                | 1.1              | 0.1              | –                | 7.8              | 2.6             | 0.5                | -1.1             |
|      |              | CHON–     | C <sub>8.75</sub> H <sub>10.58</sub> O <sub>4.01</sub> N <sub>1.2</sub>   | 196.6           | 0.5              | 1.1              | 0.2              | 3.5              | 5.1              | 2.4             | 0.6                | -0.1             |
|      | Clean period | CHON+     | C <sub>17.21</sub> H <sub>31.44</sub> O <sub>1.76</sub> N <sub>1.2</sub>  | 283.3           | 0.1              | 1.8              | 0.1              | 1.4              | 3.1              | 1.8             | 0.1                | -1.5             |
|      |              | CHN+      | C <sub>13.84</sub> H <sub>15.7</sub> N <sub>1.22</sub>                    | 199.0           | –                | 1.1              | 0.1              | –                | 7.6              | 2.6             | 0.5                | -1.1             |
|      |              | CHON–     | C <sub>8.94</sub> H <sub>11</sub> O <sub>4.01</sub> N <sub>1.21</sub>     | 199.5           | 0.5              | 1.1              | 0.2              | 3.5              | 5.0              | 2.4             | 0.5                | -0.1             |
|      | Haze period  | CHON+     | C <sub>15.51</sub> H <sub>26.89</sub> O <sub>2.27</sub> N <sub>1.36</sub> | 268.6           | 0.2              | 1.7              | 0.1              | 1.5              | 3.8              | 2.2             | 0.2                | -1.3             |
|      |              | CHN+      | C <sub>13.77</sub> H <sub>14.7</sub> N <sub>1.19</sub>                    | 196.7           | –                | 1.1              | 0.1              | –                | 8.0              | 2.6             | 0.5                | -1.1             |
|      |              | CHON–     | C <sub>8.35</sub> H <sub>9.64</sub> O <sub>4</sub> N <sub>1.17</sub>      | 190.3           | 0.5              | 1.1              | 0.2              | 3.6              | 5.1              | 2.4             | 0.6                | 0.0              |

|    |              |       |                                                                           |       |     |     |     |     |     |     |     |      |
|----|--------------|-------|---------------------------------------------------------------------------|-------|-----|-----|-----|-----|-----|-----|-----|------|
| HZ | All period   | CHON+ | C <sub>19.04</sub> H <sub>36.31</sub> O <sub>1.81</sub> N <sub>1.19</sub> | 310.6 | 0.1 | 1.9 | 0.1 | 1.5 | 2.5 | 1.7 | 0.1 | -1.7 |
|    |              | CHN+  | C <sub>13.09</sub> H <sub>19.15</sub> N <sub>1.25</sub>                   | 193.8 | –   | 1.5 | 0.1 | –   | 5.1 | 2.1 | 0.4 | -1.5 |
|    |              | CHON– | C <sub>9.64</sub> H <sub>12.79</sub> O <sub>4.05</sub> N <sub>1.28</sub>  | 211.3 | 0.5 | 1.2 | 0.2 | 3.4 | 4.9 | 2.2 | 0.5 | -0.2 |
|    | Clean period | CHON+ | C <sub>19.14</sub> H <sub>36.49</sub> O <sub>1.71</sub> N <sub>1.16</sub> | 310.0 | 0.1 | 1.9 | 0.1 | 1.5 | 2.5 | 1.6 | 0.1 | -1.7 |
|    |              | CHN+  | C <sub>12.09</sub> H <sub>16.8</sub> N <sub>1.28</sub>                    | 180.0 | –   | 1.4 | 0.1 | –   | 5.3 | 2.2 | 0.4 | -1.4 |
|    |              | CHON– | C <sub>10.2</sub> H <sub>14.28</sub> O <sub>4.16</sub> N <sub>1.29</sub>  | 221.5 | 0.5 | 1.2 | 0.2 | 3.4 | 4.7 | 2.2 | 0.5 | -0.3 |
|    | Haze period  | CHON+ | C <sub>18.95</sub> H <sub>36.14</sub> O <sub>1.91</sub> N <sub>1.21</sub> | 311.3 | 0.1 | 1.9 | 0.1 | 1.6 | 2.5 | 1.8 | 0.1 | -1.7 |
|    |              | CHN+  | C <sub>13.68</sub> H <sub>20.54</sub> N <sub>1.22</sub>                   | 202.0 | –   | 1.5 | 0.1 | –   | 5.0 | 2.1 | 0.3 | -1.5 |
|    |              | CHON– | C <sub>9.13</sub> H <sub>11.43</sub> O <sub>3.95</sub> N <sub>1.27</sub>  | 201.9 | 0.5 | 1.1 | 0.2 | 3.4 | 5.0 | 2.2 | 0.6 | -0.1 |

<sup>a</sup>The symbol “–” indicates no data.

**Table S11.** The peak intensity fraction of CHON+ compounds formed by different processes.

| City | Class              | All period |                     |                               | Clean period |                     |                               | Haze period |                     |                               |
|------|--------------------|------------|---------------------|-------------------------------|--------------|---------------------|-------------------------------|-------------|---------------------|-------------------------------|
|      |                    | Number     | Number<br>frac. (%) | Signal intensity<br>frac. (%) | Number       | Number<br>frac. (%) | Signal intensity<br>frac. (%) | Number      | Number<br>frac. (%) | Signal intensity<br>frac. (%) |
| HEB  | Cond_N             | 181        | 25.4                | 33.6                          | 179          | 25.5                | 32.5                          | 176         | 25.7                | 33.6                          |
|      | Hy_N               | 62         | 8.7                 | 3.8                           | 60           | 8.6                 | 4.1                           | 62          | 9.0                 | 3.6                           |
|      | De_N               | 16         | 2.2                 | 0.6                           | 16           | 2.3                 | 1.6                           | 16          | 2.3                 | 0.3                           |
|      | Cond_hy_N          | 206        | 28.9                | 38.1                          | 205          | 29.2                | 31.2                          | 194         | 28.3                | 40.6                          |
|      | Cond_de_N          | 46         | 6.5                 | 2.2                           | 44           | 6.3                 | 5.0                           | 42          | 6.1                 | 1.3                           |
|      | Hy_de_N            | 4          | 0.6                 | 0.1                           | 4            | 0.6                 | 0.3                           | 3           | 0.4                 | 0.0                           |
|      | Cond_hy_de_N       | 54         | 7.6                 | 4.4                           | 52           | 7.4                 | 2.6                           | 51          | 7.4                 | 4.9                           |
|      | <sup>a</sup> Mix_N | <b>310</b> | <b>43.5</b>         | <b>44.8</b>                   | <b>305</b>   | <b>43.5</b>         | <b>39.0</b>                   | <b>290</b>  | <b>42.3</b>         | <b>46.8</b>                   |
|      | Unknown_N          | 144        | 20.2                | 17.2                          | 142          | 20.2                | 22.8                          | 142         | 20.7                | 15.6                          |
|      | <b>All</b>         | <b>713</b> | <b>100.0</b>        | <b>100.0</b>                  | <b>702</b>   | <b>100.0</b>        | <b>100.0</b>                  | <b>686</b>  | <b>100.0</b>        | <b>100.0</b>                  |
| BJ   | Cond_N             | 186        | 25.6                | 34.3                          | 186          | 25.7                | 37.7                          | 179         | 25.8                | 29.7                          |
|      | Hy_N               | 66         | 9.1                 | 4.1                           | 66           | 9.1                 | 4.1                           | 60          | 8.7                 | 4.1                           |
|      | De_N               | 17         | 2.3                 | 0.6                           | 17           | 2.3                 | 0.6                           | 16          | 2.3                 | 0.7                           |
|      | Cond_hy_N          | 209        | 28.8                | 18.0                          | 208          | 28.7                | 16.6                          | 200         | 28.8                | 19.8                          |
|      | Cond_de_N          | 48         | 6.6                 | 16.4                          | 48           | 6.6                 | 17.8                          | 44          | 6.3                 | 14.5                          |
|      | Hy_de_N            | 4          | 0.6                 | 0.4                           | 4            | 0.6                 | 0.6                           | 4           | 0.6                 | 0.2                           |
|      | Cond_hy_de_N       | 55         | 7.6                 | 2.1                           | 55           | 7.6                 | 1.5                           | 53          | 7.6                 | 2.9                           |
|      | <sup>a</sup> Mix_N | <b>316</b> | <b>43.5</b>         | <b>36.9</b>                   | <b>315</b>   | <b>43.5</b>         | <b>36.5</b>                   | <b>301</b>  | <b>43.4</b>         | <b>37.4</b>                   |
|      | Unknown_N          | 142        | 19.5                | 24.1                          | 141          | 19.5                | 21.1                          | 138         | 19.9                | 28.1                          |
|      | <b>All</b>         | <b>727</b> | <b>100.0</b>        | <b>100.0</b>                  | <b>725</b>   | <b>100.0</b>        | <b>100.0</b>                  | <b>694</b>  | <b>100.0</b>        | <b>100.0</b>                  |

|    |                          |            |              |              |            |              |              |            |              |              |
|----|--------------------------|------------|--------------|--------------|------------|--------------|--------------|------------|--------------|--------------|
|    | Cond_N                   | 181        | 25.3         | 31.9         | 179        | 25.6         | 33.8         | 177        | 25.4         | 29.9         |
|    | Hy_N                     | 63         | 8.8          | 5.7          | 62         | 8.9          | 5.5          | 63         | 9.0          | 5.9          |
|    | De_N                     | 16         | 2.2          | 0.7          | 14         | 2.0          | 0.4          | 16         | 2.3          | 0.7          |
|    | Cond_hy_N                | 209        | 29.2         | 17.2         | 203        | 29.0         | 18.4         | 202        | 29.0         | 16.1         |
| HZ | Cond_de_N                | 45         | 6.3          | 19.9         | 44         | 6.3          | 19.3         | 44         | 6.3          | 20.6         |
|    | Hy_de_N                  | 3          | 0.4          | 0.6          | 3          | 0.4          | 0.8          | 3          | 0.4          | 0.5          |
|    | Cond_hy_de_N             | 54         | 7.6          | 1.4          | 53         | 7.6          | 1.1          | 52         | 7.5          | 1.8          |
|    | <b><sup>a</sup>Mix_N</b> | <b>311</b> | <b>43.5</b>  | <b>39.2</b>  | <b>303</b> | <b>43.3</b>  | <b>39.5</b>  | <b>301</b> | <b>43.2</b>  | <b>38.9</b>  |
|    | Unknown_N                | 144        | 20.1         | 22.6         | 142        | 20.3         | 20.8         | 140        | 20.1         | 24.5         |
|    | <b>All</b>               | <b>715</b> | <b>100.0</b> | <b>100.0</b> | <b>700</b> | <b>100.0</b> | <b>100.0</b> | <b>697</b> | <b>100.0</b> | <b>100.0</b> |

<sup>a</sup> Mix\_N process includes cond\_hy\_N, cond\_de\_N, hy\_de\_N, and cond\_hy\_de\_N pathways.

**Table S12.** The peak intensity fraction of CHN+ compounds formed by different processes.

| City | Class      | All period |                  |                            | Clean period |                  |                            | Haze period |                  |                            |
|------|------------|------------|------------------|----------------------------|--------------|------------------|----------------------------|-------------|------------------|----------------------------|
|      |            | Number     | Number frac. (%) | Signal intensity frac. (%) | Number       | Number frac. (%) | Signal intensity frac. (%) | Number      | Number frac. (%) | Signal intensity frac. (%) |
| HEB  | Cond_N     | 134        | 27.4             | 21.2                       | 129          | 22.7             | 20.5                       | 134         | 28.6             | 21.5                       |
|      | De_N       | 39         | 1.8              | 6.2                        | 38           | 1.1              | 6.0                        | 39          | 2.0              | 6.3                        |
|      | Cond_de_N  | 172        | 33.8             | 27.2                       | 172          | 37.7             | 27.3                       | 165         | 32.8             | 26.5                       |
|      | Unknown_N  | 288        | 37.0             | 45.5                       | 291          | 38.5             | 46.2                       | 284         | 36.7             | 45.7                       |
|      | <b>All</b> | <b>633</b> | <b>100.0</b>     | <b>100.0</b>               | <b>630</b>   | <b>100.0</b>     | <b>100.0</b>               | <b>622</b>  | <b>100.0</b>     | <b>100.0</b>               |
| BJ   | Cond_N     | 133        | 20.4             | 21.0                       | 133          | 20.4             | 21.1                       | 127         | 20.3             | 20.5                       |
|      | De_N       | 39         | 5.7              | 6.2                        | 39           | 5.4              | 6.2                        | 38          | 6.0              | 6.1                        |
|      | Cond_de_N  | 172        | 34.8             | 27.1                       | 172          | 38.5             | 27.3                       | 169         | 31.8             | 27.2                       |
|      | Unknown_N  | 290        | 39.1             | 45.7                       | 287          | 35.7             | 45.5                       | 287         | 41.9             | 46.2                       |
|      | <b>All</b> | <b>634</b> | <b>100.0</b>     | <b>100.0</b>               | <b>631</b>   | <b>100.0</b>     | <b>100.0</b>               | <b>621</b>  | <b>100.0</b>     | <b>100.0</b>               |
| HZ   | Cond_N     | 134        | 12.6             | 21.2                       | 132          | 13.1             | 21.2                       | 134         | 12.8             | 21.5                       |
|      | De_N       | 39         | 10.3             | 6.2                        | 38           | 9.5              | 6.1                        | 38          | 10.7             | 6.1                        |
|      | Cond_de_N  | 174        | 38.0             | 27.5                       | 174          | 47.7             | 27.9                       | 161         | 31.7             | 25.8                       |
|      | Unknown_N  | 285        | 39.1             | 45.1                       | 280          | 29.7             | 44.9                       | 290         | 44.8             | 46.6                       |
|      | <b>All</b> | <b>632</b> | <b>100.0</b>     | <b>100.0</b>               | <b>624</b>   | <b>100.0</b>     | <b>100.0</b>               | <b>623</b>  | <b>100.0</b>     | <b>100.0</b>               |

**Table S13.** The peak intensity fraction of CHON– compounds formed by different processes.

| City | Class      | All period |                  |                            | Clean period |                  |                            | Haze period |                  |                            |
|------|------------|------------|------------------|----------------------------|--------------|------------------|----------------------------|-------------|------------------|----------------------------|
|      |            | Number     | Number frac. (%) | Signal intensity frac. (%) | Number       | Number frac. (%) | Signal intensity frac. (%) | Number      | Number frac. (%) | Signal intensity frac. (%) |
| HEB  | Ox_N       | 104        | 10.8             | 35.1                       | 104          | 12.3             | 35.1                       | 104         | 9.6              | 35.1                       |
|      | Hy_N       | 12         | 1.7              | 4.1                        | 12           | 1.2              | 4.1                        | 12          | 2.2              | 4.1                        |
|      | Ox_hy_N    | 35         | 66.4             | 11.8                       | 35           | 63.7             | 11.8                       | 35          | 68.6             | 11.8                       |
|      | Unknown_N  | 145        | 21.1             | 49.0                       | 145          | 22.9             | 49.0                       | 145         | 19.6             | 49.0                       |
|      | <b>All</b> | <b>296</b> | <b>100.0</b>     | <b>100.0</b>               | <b>296</b>   | <b>100.0</b>     | <b>100.0</b>               | <b>296</b>  | <b>100.0</b>     | <b>100.0</b>               |
| BJ   | Ox_N       | 107        | 15.2             | 35.7                       | 107          | 15.9             | 35.7                       | 105         | 13.6             | 35.4                       |
|      | Hy_N       | 12         | 1.3              | 4.0                        | 12           | 1.5              | 4.0                        | 11          | 0.8              | 3.7                        |
|      | Ox_hy_N    | 35         | 57.0             | 11.7                       | 35           | 53.9             | 11.7                       | 35          | 63.7             | 11.8                       |
|      | Unknown_N  | 146        | 26.6             | 48.7                       | 146          | 28.7             | 48.7                       | 146         | 21.9             | 49.2                       |
|      | <b>All</b> | <b>300</b> | <b>100.0</b>     | <b>100.0</b>               | <b>300</b>   | <b>100.0</b>     | <b>100.0</b>               | <b>297</b>  | <b>100.0</b>     | <b>100.0</b>               |
| HZ   | Ox_N       | 107        | 18.1             | 35.6                       | 107          | 15.8             | 35.7                       | 102         | 20.1             | 33.9                       |
|      | Hy_N       | 12         | 0.6              | 4.0                        | 12           | 0.6              | 4.0                        | 12          | 0.7              | 4.0                        |
|      | Ox_hy_N    | 35         | 46.1             | 11.6                       | 35           | 45.0             | 11.7                       | 35          | 47.0             | 11.6                       |
|      | Unknown_N  | 147        | 35.2             | 48.8                       | 146          | 38.6             | 48.7                       | 152         | 32.2             | 50.5                       |
|      | <b>All</b> | <b>301</b> | <b>100.0</b>     | <b>100.0</b>               | <b>300</b>   | <b>100.0</b>     | <b>100.0</b>               | <b>301</b>  | <b>100.0</b>     | <b>100.0</b>               |

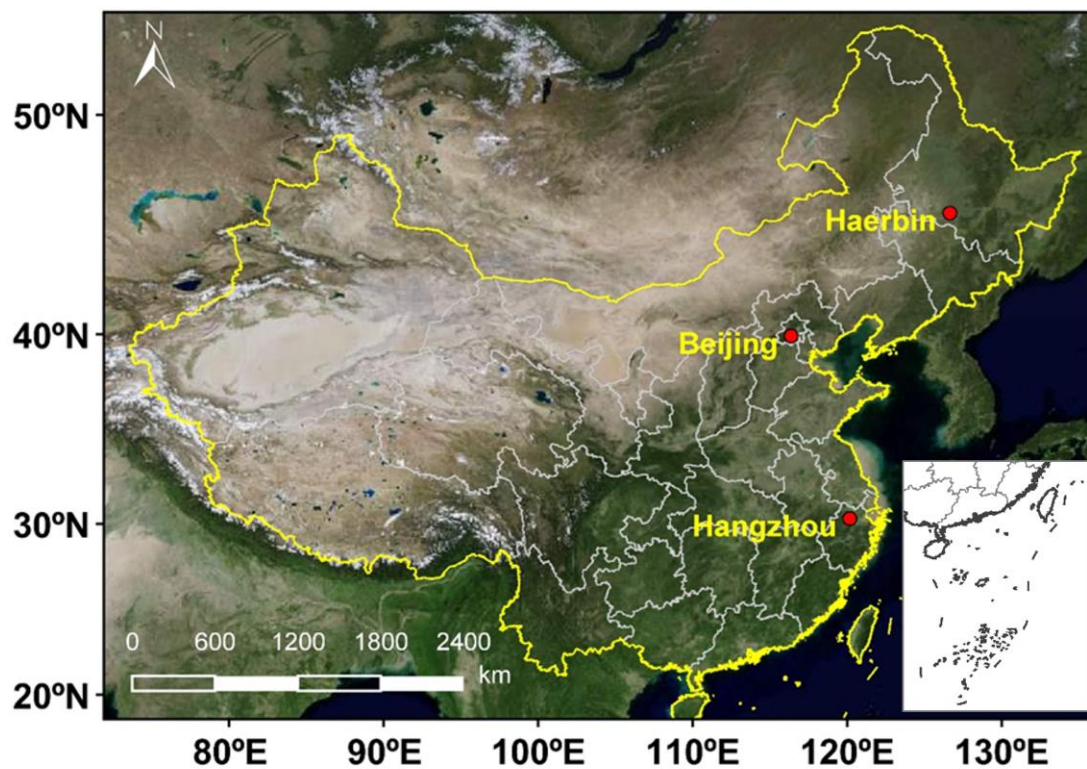

**Figure S1.** The location showing the PM<sub>2.5</sub> sampling site in HEB, BJ, and HZ, respectively. The map is derived from ©MeteoInfoMap (version 3.6.2) (Chinese Academy of Meteorological Sciences, China).

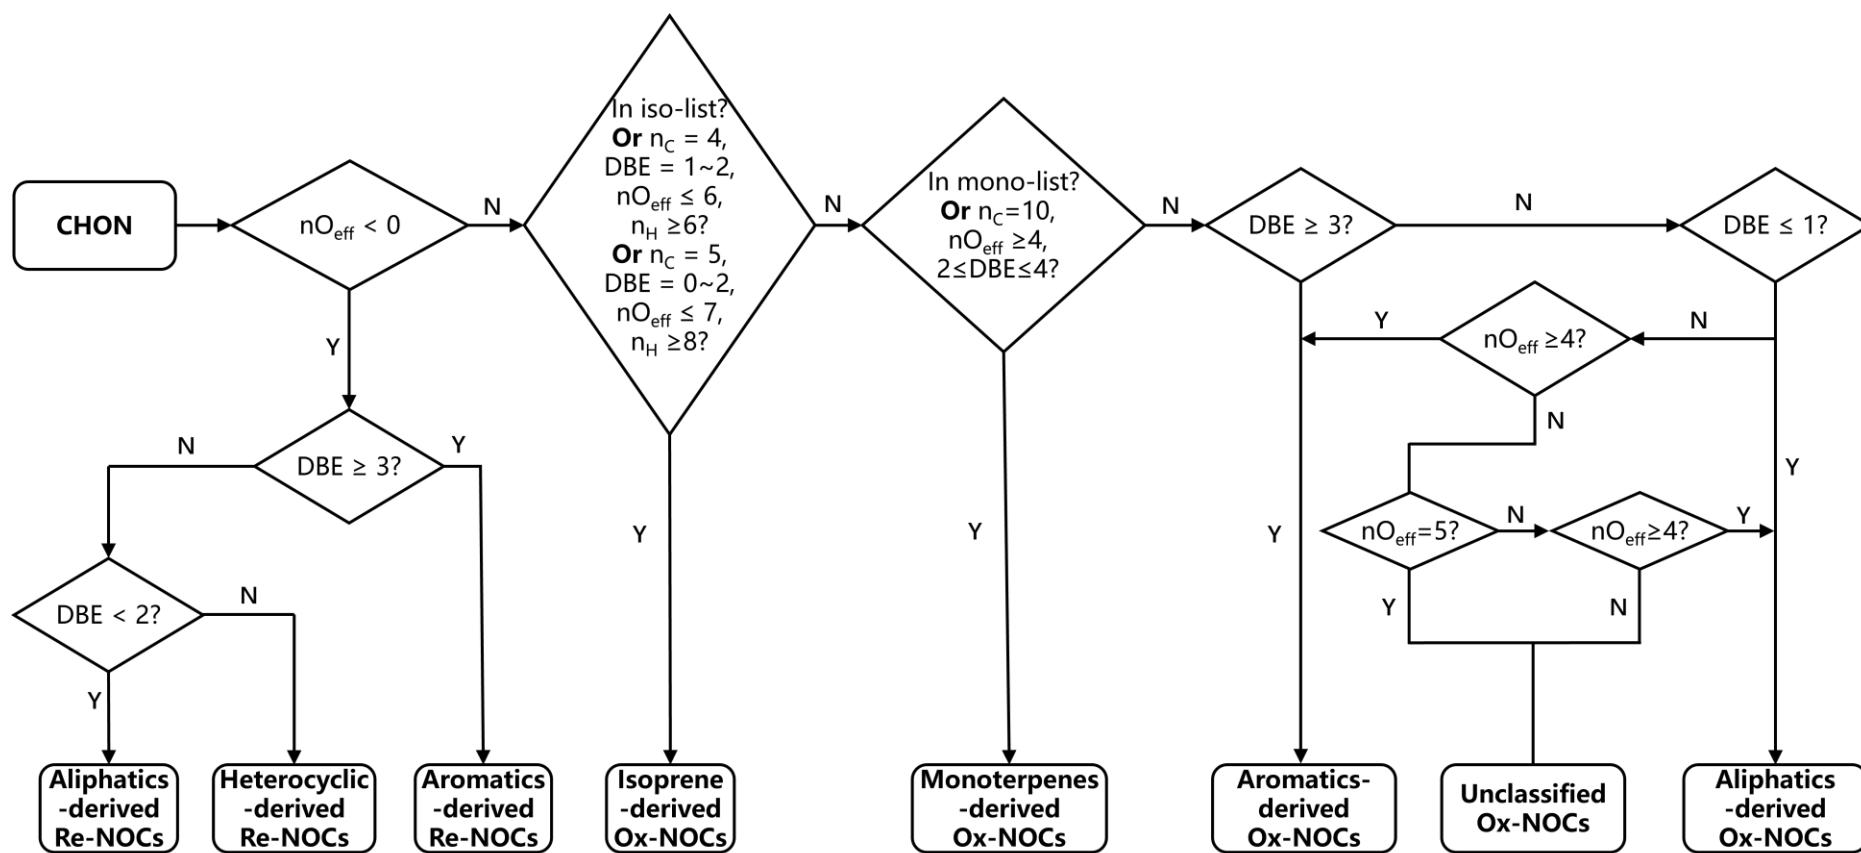

**Figure S2.** Workflow for identifying the potential precursors of CHON compounds. The symbol  $nO_{eff}$ ,  $n_C$ ,  $n_H$ , and  $n_N$  represent the number of effective oxygen, hydrogen, and nitrogen atoms in each CHON molecular formula, respectively. The symbol "Y" and "N" represent yes and no, respectively.



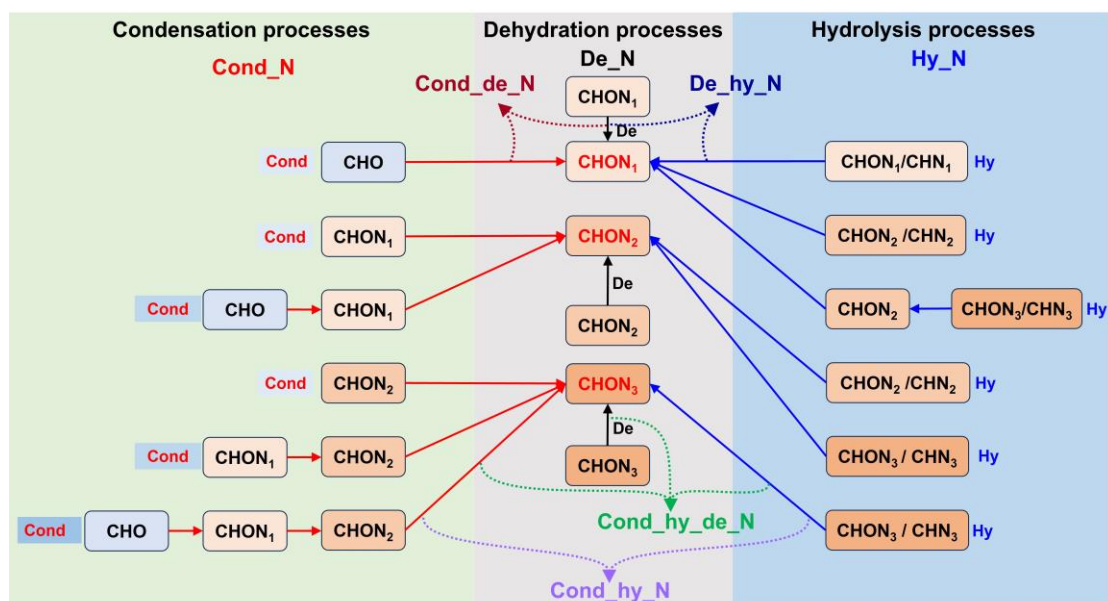

**Figure S3.** Schematic diagram for identifying different formation processes of CHON<sub>N</sub> compounds.

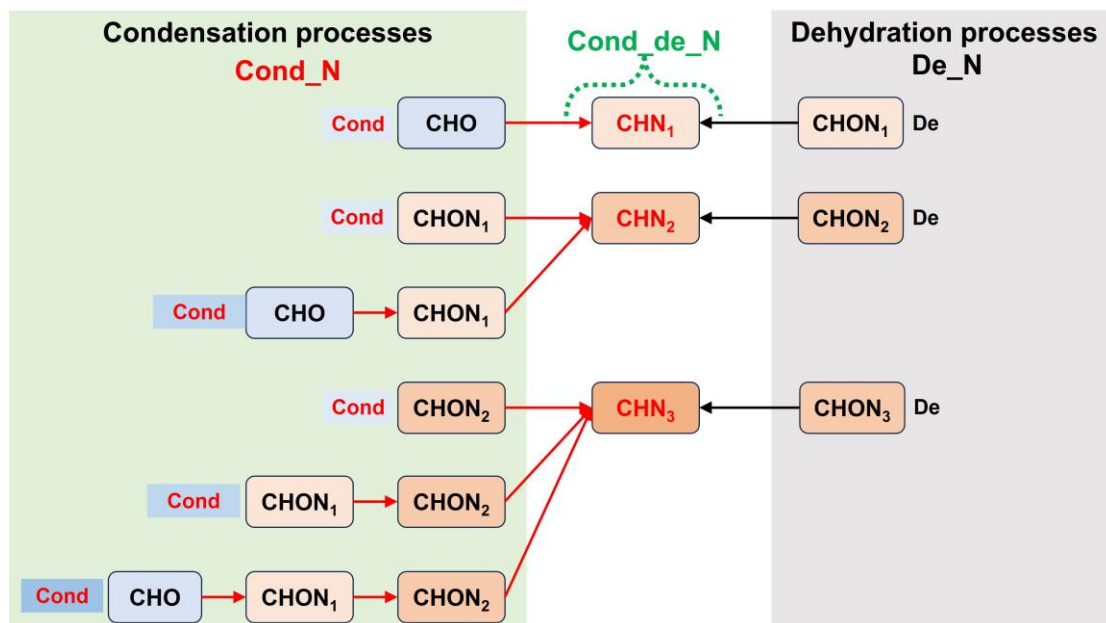

**Figure S4.** Schematic diagram for identifying different formation processes of CHN<sub>N</sub> compounds.

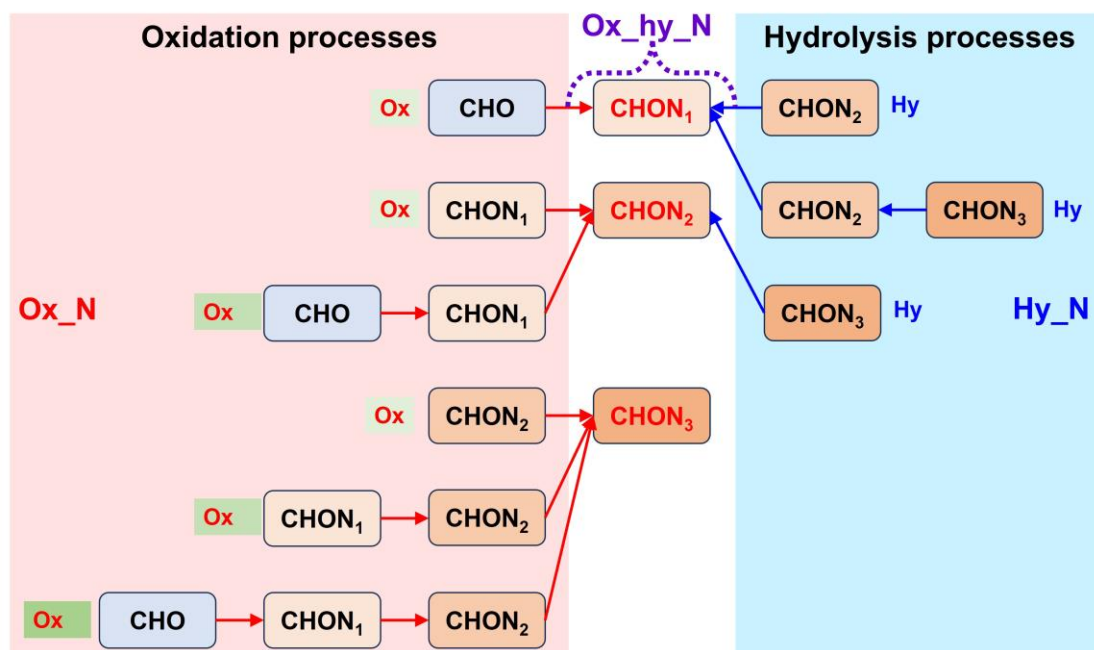

**Figure S5.** Schematic diagram for identifying different formation processes of CHON-compounds.

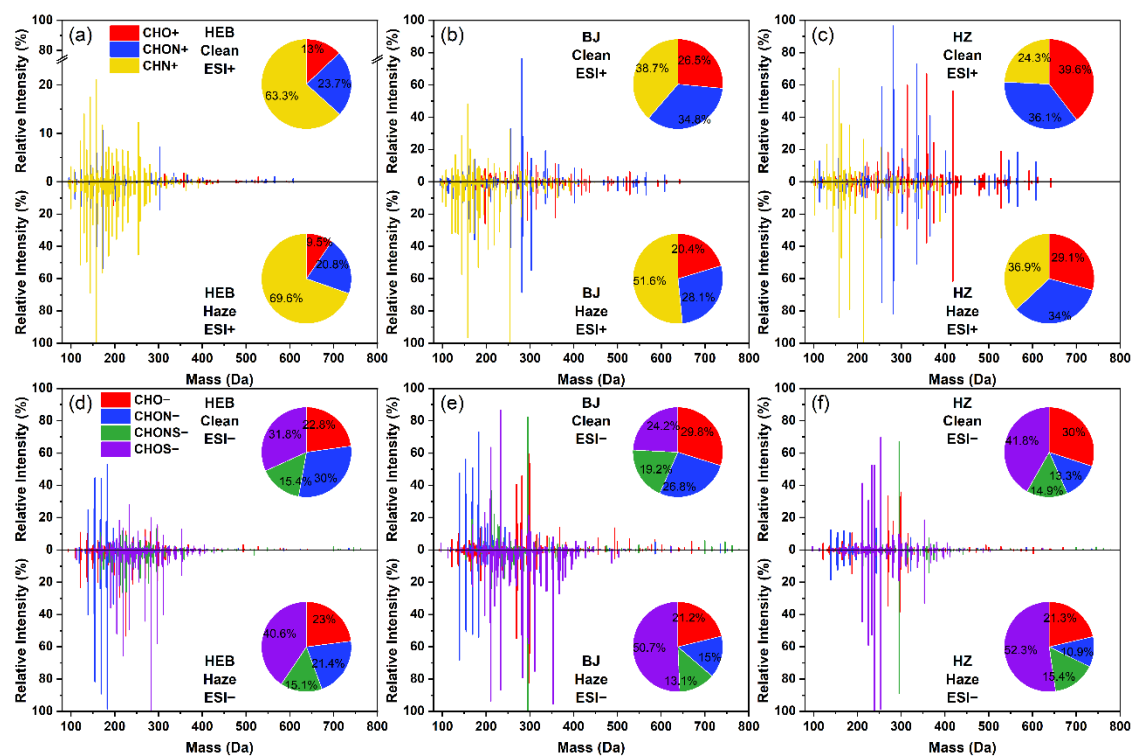

**Figure S6.** The reconstructed mass spectrum distribution of the detected species in PM<sub>2.5</sub> in (a–c) ESI+ and (d–f) ESI– modes in different cities. The vertical axis refers to the relative signal intensity of each individual compound compared to the compound with the greatest peak intensity. The pie charts inside show the signal intensity fractions of classified compounds of all species detected in PM<sub>2.5</sub> in different periods.

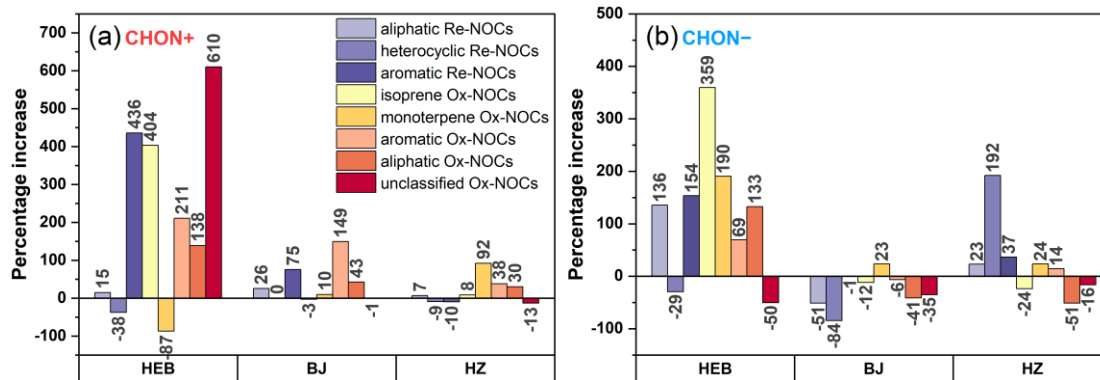

**Figure S7.** Percentage variations in the signal intensity of each subgroup of (a) CHON+ and (b) CHON- compounds from haze to clean periods in different cities.

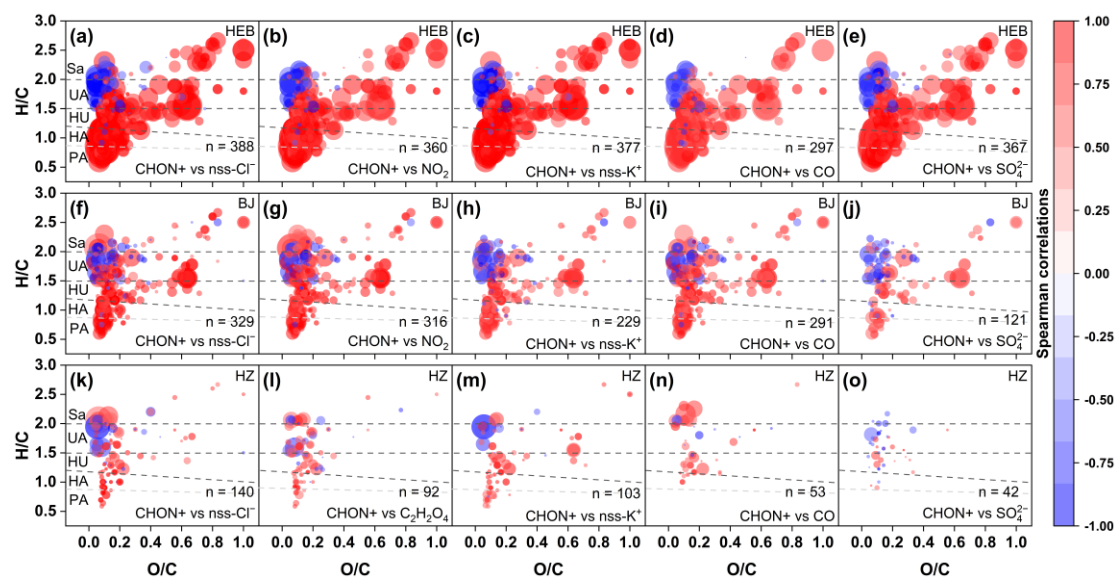

**Figure S8.** Spearman rank correlation coefficients (with  $P < 0.01$  in HEB and  $P < 0.05$  in BJ and HZ) of individual CHON+ molecules with selected parameters in (a–e) HEB, (f–j) BJ, and (k–o) HZ. The color scale indicates Spearman correlations between the intensity of individual CHON+ molecules and each parameter. The symbol  $n$  in the bottom right corner of each panel indicates the number of molecular formulas significantly correlated with the variables (e.g.,  $\text{nss-Cl}^-$ ,  $\text{nss-K}^+$ , and CO). The subgroups of compounds in the panels include polycyclic aromatic-like (PA), highly aromatic-like (HA), highly unsaturated-like (HU), unsaturated aliphatic-like (UA), and saturated-like (Sa) compounds.

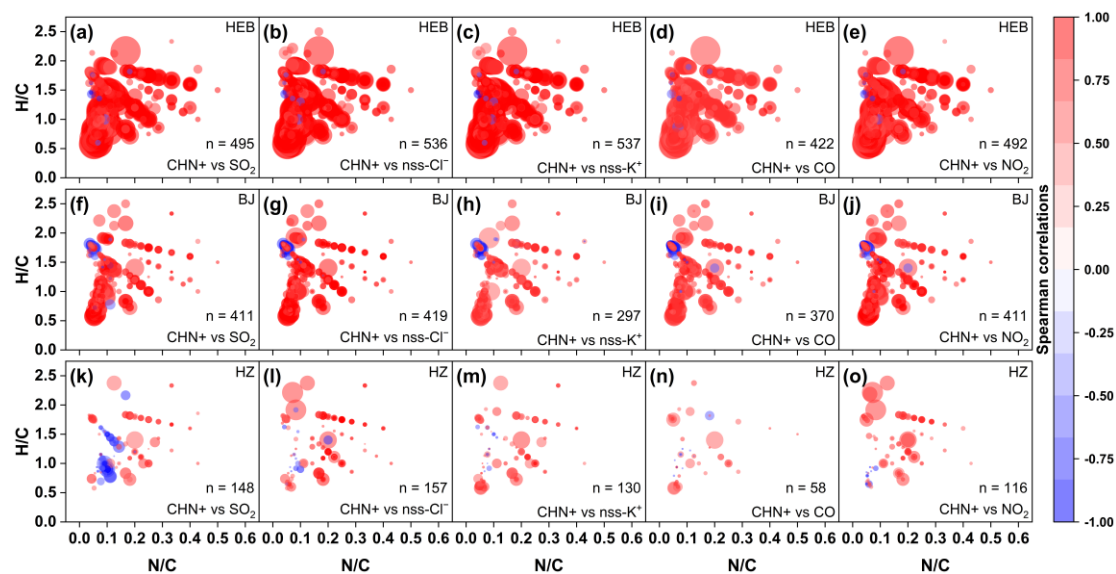

**Figure S9.** Spearman rank correlation coefficients (with  $P < 0.01$  in HEB and  $P < 0.05$  in BJ and HZ) of individual CHN+ molecules with selected parameters in (a–e) HEB, (f–j) BJ, and (k–o) HZ. The color scale indicates Spearman correlations between the intensity of individual CHN+ molecules and each parameter. The symbol  $n$  in the bottom right corner of each panel indicates the number of molecular formulas significantly correlated with the variables (e.g.,  $\text{SO}_2$ ,  $\text{nss-Cl}^-$ ,  $\text{nss-K}^+$ ,  $\text{CO}$ , and  $\text{NO}_2$ ).

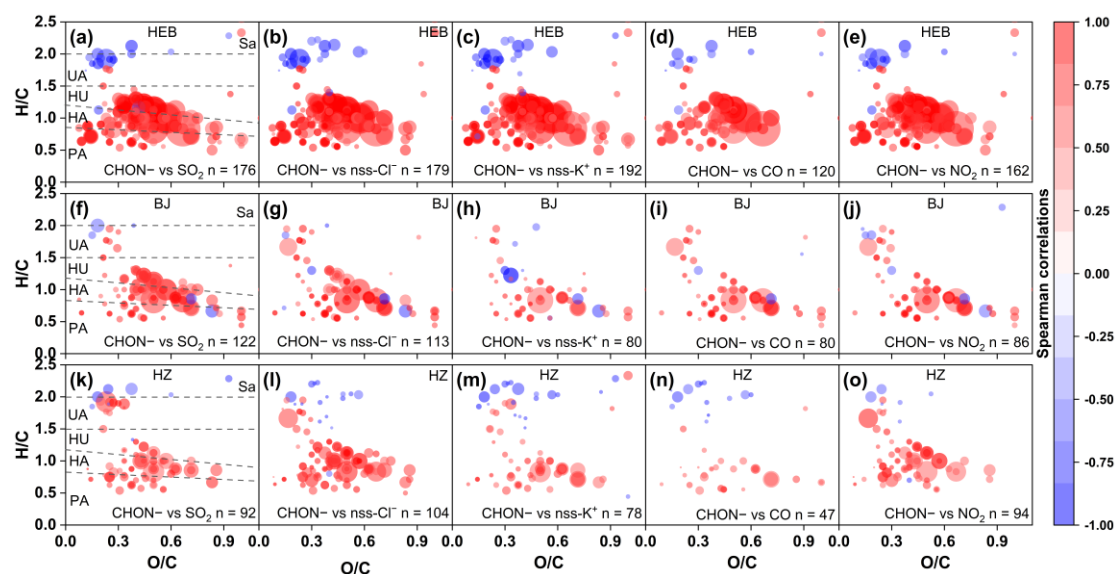

**Figure S10.** Spearman rank correlation coefficients (with  $P < 0.01$  in HEB and  $P < 0.05$  in BJ and HZ) of individual CHON<sup>-</sup> molecules with selected parameters in (a–e) HEB, (f–j) BJ, and (k–o) HZ. The color scale indicates Spearman correlations between the intensity of individual CHON<sup>-</sup> molecules and each parameter. The symbol  $n$  in the bottom right corner of each panel indicates the number of molecular formulas significantly correlated with the variables (e.g., SO<sub>2</sub>, nss-Cl<sup>-</sup>, nss-K<sup>-</sup>, CO, and NO<sub>2</sub>). The subgroups of compounds in the panels include polycyclic aromatic-like (PA), highly aromatic-like (HA), highly unsaturated-like (HU), unsaturated aliphatic-like (UA), and saturated-like (Sa) compounds.



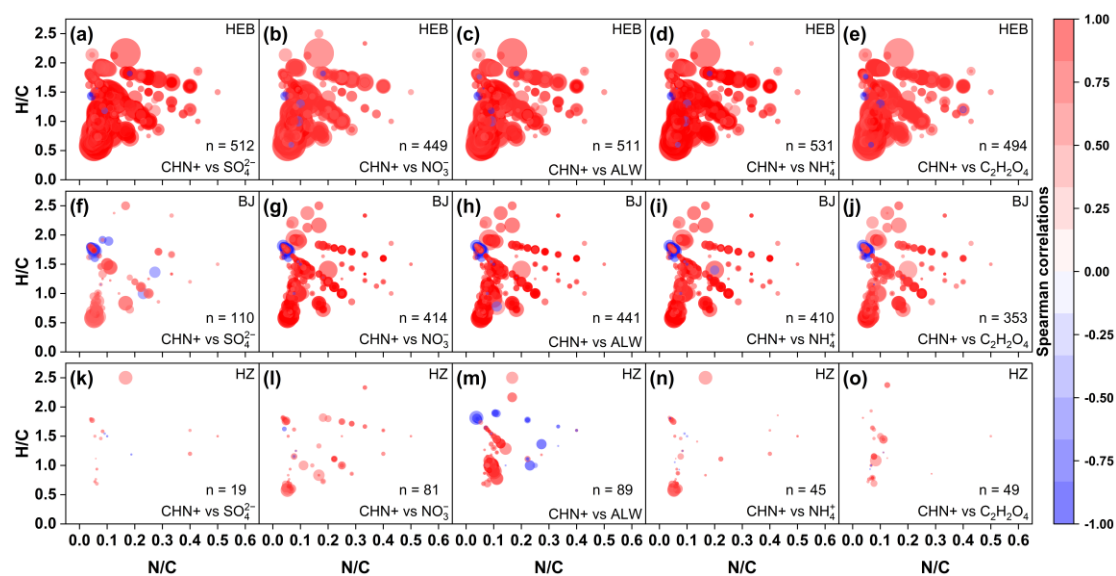

**Figure S11.** Spearman rank correlation coefficients (with  $P < 0.01$  in HEB and  $P < 0.05$  in BJ and HZ) of individual CHN+ molecules with selected parameters in (a–e) HEB, (f–j) BJ, and (k–o) HZ. The color scale indicates Spearman correlations between the intensity of individual CHN+ molecules and each parameter. The symbol  $n$  in the bottom right corner of each panel indicates the number of molecular formulas significantly correlated with the variables (e.g.,  $\text{SO}_4^{2+}$ ,  $\text{NO}_3^-$ , ALW,  $\text{NH}_4^+$ , and  $\text{C}_2\text{H}_4\text{O}_4$ ).

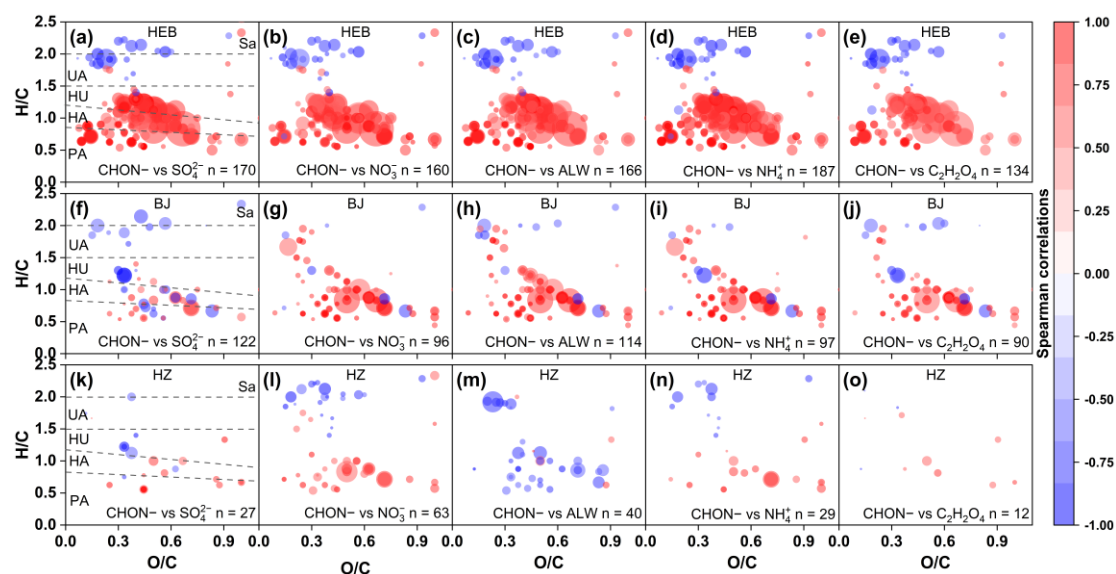

**Figure S12.** Spearman rank correlation coefficients (with  $P < 0.01$  in HEB and  $P < 0.05$  in BJ and HZ) of individual CHON<sup>-</sup> molecules with selected parameters in (a–e) HEB, (f–j) BJ, and (k–o) HZ. The color scale indicates Spearman correlations between the intensity of individual CHON<sup>-</sup> molecules and each parameter. The symbol  $n$  in the bottom right corner of each panel indicates the number of molecular formulas significantly correlated with the variables (e.g.,  $\text{SO}_4^{2+}$ ,  $\text{NO}_3^-$ , ALW,  $\text{NH}_4^+$ , and  $\text{C}_2\text{H}_4\text{O}_4$ ). The subgroups of compounds in the panels include polycyclic aromatic-like (PA), highly aromatic-like (HA), highly unsaturated-like (HU), unsaturated aliphatic-like (UA), and saturated-like (Sa) compounds.

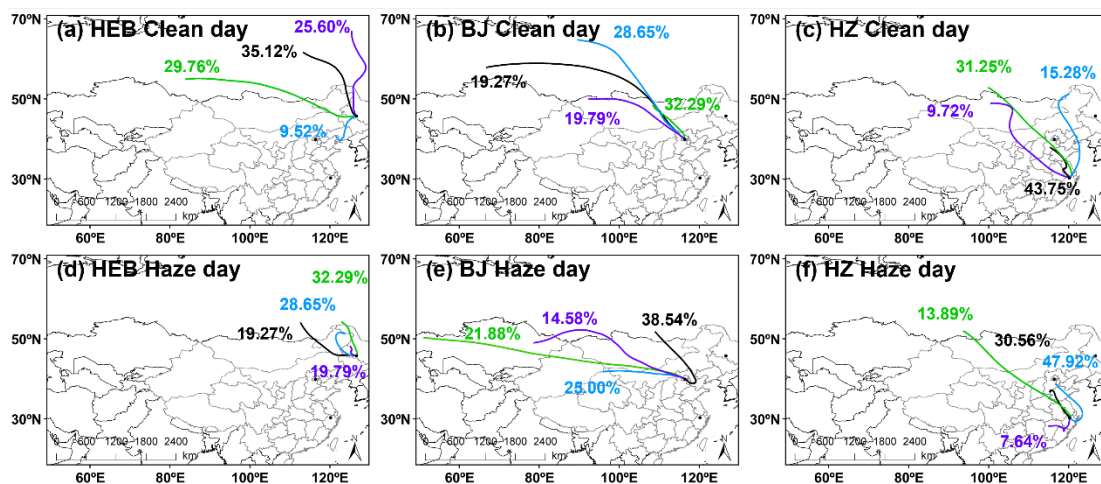

**Figure S13.** The 3 d (72 h) back trajectories illustrating the major air mass transmitted to the study sites during the (a–c) clean and (d–f) haze periods. The map is derived from ©MeteoInfoMap (version 3.6.2) (Chinese Academy of Meteorological Sciences, China).

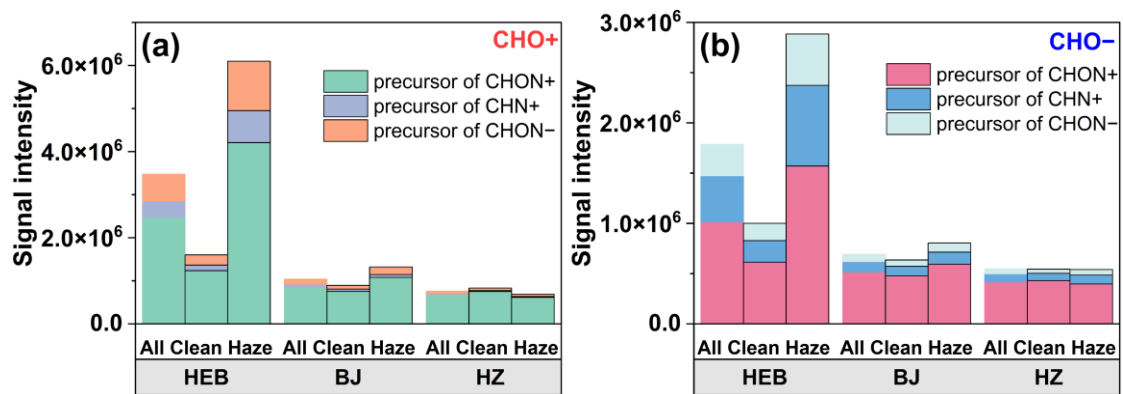

**Figure S14.** Average signal intensity distributions for the (a) CHO+ and (b) CHO- precursors of NOCs in PM<sub>2.5</sub> collected from different cities during winter.

## REFERENCES

- Abudumutailifu, M., Shang, X., Wang, L., Zhang, M., Kang, H., Chen, Y., Li, L., Ju, R., Li, B., Ouyang, H., Tang, X., Li, C., Wang, L., Wang, X., George, C., Rudich, Y., Zhang, R., and Chen, J.: Unveiling the Molecular Characteristics, Origins, and Formation Mechanism of Reduced Nitrogen Organic Compounds in the Urban Atmosphere of Shanghai Using a Versatile Aerosol Concentration Enrichment System, *Environ. Sci. Technol.*, 10.1021/acs.est.3c04071, 2024.
- Bae, E., Yeo, I. J., Jeong, B., Shin, Y., Shin, K.-H., and Kim, S.: Study of Double Bond Equivalent and the Numbers of Carbon and Oxygen Atom Distribution of Dissolved Organic Matter with Negative-Mode FT-ICR MS, *Anal. Chem.*, 83, 4193-4199, 10.1021/ac200464q, 2011.
- Boyd, C. M., Sanchez, J., Xu, L., Eugene, A. J., Nah, T., Tuet, W. Y., Guzman, M. I., and Ng, N. L.: Secondary organic aerosol formation from the  $\beta$ -pinene+NO<sub>3</sub> system: effect of humidity and peroxy radical fate, *Atmos. Chem. Phys.*, 15, 7497-7522, 10.5194/acp-15-7497-2015, 2015.
- Darer, A. I., Cole-Filipiak, N. C., O'Connor, A. E., and Elrod, M. J.: Formation and Stability of Atmospherically Relevant Isoprene-Derived Organosulfates and Organonitrates, *Environ. Sci. Technol.*, 45, 1895-1902, 10.1021/es103797z, 2011.
- DeVault, M. P. and Ziemann, P. J.: Gas- and Particle-Phase Products and Their Mechanisms of Formation from the Reaction of  $\Delta$ -3-Carene with NO<sub>3</sub> Radicals, *The Journal of Physical Chemistry A*, 125, 10207-10222, 10.1021/acs.jpca.1c07763, 2021.

- Draper, D. C., Farmer, D. K., Desyaterik, Y., and Fry, J. L.: A qualitative comparison of secondary organic aerosol yields and composition from ozonolysis of monoterpenes at varying concentrations of NO<sub>2</sub>, *Atmos. Chem. Phys.*, 15, 12267-12281, 10.5194/acp-15-12267-2015, 2015.
- Guo, Y., Shen, H., Pullinen, I., Luo, H., Kang, S., Vereecken, L., Fuchs, H., Hallquist, M., Acir, I. H., Tillmann, R., Rohrer, F., Wildt, J., Kiendler-Scharr, A., Wahner, A., Zhao, D., and Mentel, T. F.: Identification of highly oxygenated organic molecules and their role in aerosol formation in the reaction of limonene with nitrate radical, *Atmos. Chem. Phys.*, 22, 11323-11346, 10.5194/acp-22-11323-2022, 2022a.
- Guo, Y., Yan, C., Liu, Y., Qiao, X., Zheng, F., Zhang, Y., Zhou, Y., Li, C., Fan, X., Lin, Z., Feng, Z., Zhang, Y., Zheng, P., Tian, L., Nie, W., Wang, Z., Huang, D., Daellenbach, K. R., Yao, L., Dada, L., Bianchi, F., Jiang, J., Liu, Y., Kerminen, V. M., and Kulmala, M.: Seasonal variation in oxygenated organic molecules in urban Beijing and their contribution to secondary organic aerosol, *Atmos. Chem. Phys.*, 22, 10077-10097, 10.5194/acp-22-10077-2022, 2022b.
- Jiang, H., Cai, J., Feng, X., Chen, Y., Wang, L., Jiang, B., Liao, Y., Li, J., Zhang, G., Mu, Y., and Chen, J.: Aqueous-Phase Reactions of Anthropogenic Emissions Lead to the High Chemodiversity of Atmospheric Nitrogen-Containing Compounds during the Haze Event, *Environ. Sci. Technol.*, 57, 16500-16511, 10.1021/acs.est.3c06648, 2023.
- Kames, J., Schurath, U., Flocke, F., and Volz-Thomas, A.: Preparation of organic nitrates from alcohols and N<sub>2</sub>O<sub>5</sub> for species identification in atmospheric samples,

- Journal of Atmospheric Chemistry, 16, 349-359, 10.1007/BF01032630, 1993.
- Kroll, J. H., Donahue, N. M., Jimenez, J. L., Kessler, S. H., Canagaratna, M. R., Wilson, K. R., Altieri, K. E., Mazzoleni, L. R., Wozniak, A. S., Bluhm, H., Mysak, E. R., Smith, J. D., Kolb, C. E., and Worsnop, D. R.: Carbon oxidation state as a metric for describing the chemistry of atmospheric organic aerosol, *Nat. Chem.*, 3, 133-139, <https://doi.org/10.1038/nchem.948>, 2011.
- Kruve, A., Kaupmees, K., Liigand, J., and Leito, I.: Negative Electrospray Ionization via Deprotonation: Predicting the Ionization Efficiency, *Anal. Chem.*, 86, 4822-4830, 10.1021/ac404066v, 2014.
- Laskin, J., Laskin, A., Roach, P. J., Slysz, G. W., Anderson, G. A., Nizkorodov, S. A., Bones, D. L., and Nguyen, L. Q.: High-Resolution Desorption Electrospray Ionization Mass Spectrometry for Chemical Characterization of Organic Aerosols, *Anal. Chem.*, 82, 2048-2058, 10.1021/ac902801f, 2010.
- Laskin, J., Laskin, A., Nizkorodov, S. A., Roach, P., Eckert, P., Gilles, M. K., Wang, B., Lee, H. J., and Hu, Q.: Molecular Selectivity of Brown Carbon Chromophores, *Environ. Sci. Technol.*, 48, 12047-12055, <https://doi.org/10.1021/es503432r>, 2014.
- Lechtenfeld, O. J., Kattner, G., Flerus, R., McCallister, S. L., Schmitt-Kopplin, P., and Koch, B. P.: Molecular transformation and degradation of refractory dissolved organic matter in the Atlantic and Southern Ocean, *Geochim. Cosmochim. Acta*, 126, 321-337, <https://doi.org/10.1016/j.gca.2013.11.009>, 2014.
- Leito, I., Herodes, K., Huopolainen, M., Virro, K., Künnapas, A., Kruve, A., and Tanner, R.: Towards the electrospray ionization mass spectrometry ionization efficiency

- scale of organic compounds, *Rapid Commun. Mass Spectrom.*, 22, 379-384, <https://doi.org/10.1002/rcm.3371>, 2008.
- Liu, X., Wang, H., Wang, F., Lv, S., Wu, C., Zhao, Y., Zhang, S., Liu, S., Xu, X., Lei, Y., and Wang, G.: Secondary Formation of Atmospheric Brown Carbon in China Haze: Implication for an Enhancing Role of Ammonia, *Environ. Sci. Technol.*, 57, 11163-11172, 10.1021/acs.est.3c03948, 2023a.
- Liu, Z., Zhu, B., Zhu, C., Ruan, T., Li, J., Chen, H., Li, Q., Wang, X., Wang, L., Mu, Y., Collett, J., George, C., Wang, Y., Wang, X., Su, J., Yu, S., Mellouki, A., Chen, J., and Jiang, G.: Abundant nitrogenous secondary organic aerosol formation accelerated by cloud processing, *iScience*, 26, 108317, <https://doi.org/10.1016/j.isci.2023.108317>, 2023b.
- Lv, S., Wang, F., Wu, C., Chen, Y., Liu, S., Zhang, S., Li, D., Du, W., Zhang, F., Wang, H., Huang, C., Fu, Q., Duan, Y., and Wang, G.: Gas-to-Aerosol Phase Partitioning of Atmospheric Water-Soluble Organic Compounds at a Rural Site in China: An Enhancing Effect of NH<sub>3</sub> on SOA Formation, *Environ. Sci. Technol.*, 56, 3915-3924, 10.1021/acs.est.1c06855, 2022.
- Ng, N. L., Kwan, A. J., Surratt, J. D., Chan, A. W. H., Chhabra, P. S., Sorooshian, A., Pye, H. O. T., Crouse, J. D., Wennberg, P. O., Flagan, R. C., and Seinfeld, J. H.: Secondary organic aerosol (SOA) formation from reaction of isoprene with nitrate radicals (NO<sub>3</sub>), *Atmos. Chem. Phys.*, 8, 4117-4140, 10.5194/acp-8-4117-2008, 2008.
- Ni, T., Li, P., Han, B., Bai, Z., Ding, X., Wang, Q., Huo, J., and Lu, B.: Spatial and



- Temporal Variation of Chemical Composition and Mass Closure of Ambient PM10 in Tianjin, China, *Aerosol and Air Quality Research*, 13, 1832-1846, 10.4209/aaqr.2012.10.0283, 2013.
- Nie, W., Yan, C., Huang, D. D., Wang, Z., Liu, Y., Qiao, X., Guo, Y., Tian, L., Zheng, P., Xu, Z., Li, Y., Xu, Z., Qi, X., Sun, P., Wang, J., Zheng, F., Li, X., Yin, R., Dallenbach, K. R., Bianchi, F., Petäjä, T., Zhang, Y., Wang, M., Schervish, M., Wang, S., Qiao, L., Wang, Q., Zhou, M., Wang, H., Yu, C., Yao, D., Guo, H., Ye, P., Lee, S., Li, Y. J., Liu, Y., Chi, X., Kerminen, V.-M., Ehn, M., Donahue, N. M., Wang, T., Huang, C., Kulmala, M., Worsnop, D., Jiang, J., and Ding, A.: Secondary organic aerosol formed by condensing anthropogenic vapours over China's megacities, *Nature Geoscience*, 15, 255-261, 10.1038/s41561-022-00922-5, 2022.
- Pullinen, I., Schmitt, S., Kang, S., Sarrafzadeh, M., Schlag, P., Andres, S., Kleist, E., Mentel, T. F., Rohrer, F., Springer, M., Tillmann, R., Wildt, J., Wu, C., Zhao, D., Wahner, A., and Kiendler-Scharr, A.: Impact of NO<sub>x</sub> on secondary organic aerosol (SOA) formation from  $\alpha$ -pinene and  $\beta$ -pinene photooxidation: the role of highly oxygenated organic nitrates, *Atmos. Chem. Phys.*, 20, 10125-10147, 10.5194/acp-20-10125-2020, 2020.
- Schmidt, A.-C., Herzsuh, R., Matysik, F.-M., and Engewald, W.: Investigation of the ionisation and fragmentation behaviour of different nitroaromatic compounds occurring as polar metabolites of explosives using electrospray ionisation tandem mass spectrometry, *Rapid Commun. Mass Spectrom.*, 20, 2293-2302, <https://doi.org/10.1002/rcm.2591>, 2006.

- Seidel, M., Beck, M., Riedel, T., Waska, H., Suryaputra, I. G. N. A., Schnetger, B., Niggemann, J., Simon, M., and Dittmar, T.: Biogeochemistry of dissolved organic matter in an anoxic intertidal creek bank, *Geochim. Cosmochim. Acta*, 140, 418-434, <https://doi.org/10.1016/j.gca.2014.05.038>, 2014.
- Shen, H., Vereecken, L., Kang, S., Pullinen, I., Fuchs, H., Zhao, D., and Mentel, T. F.: Unexpected significance of a minor reaction pathway in daytime formation of biogenic highly oxygenated organic compounds, *Science Advances*, 8, eabp8702, doi:10.1126/sciadv.abp8702, 2022.
- Shen, H., Zhao, D., Pullinen, I., Kang, S., Vereecken, L., Fuchs, H., Acir, I.-H., Tillmann, R., Rohrer, F., Wildt, J., Kiendler-Scharr, A., Wahner, A., and Mentel, T. F.: Highly Oxygenated Organic Nitrates Formed from NO<sub>3</sub> Radical-Initiated Oxidation of  $\beta$ -Pinene, *Environ. Sci. Technol.*, 10.1021/acs.est.1c03978, 2021.
- Simoneit, B. R. T., Rushdi, A. I., bin Abas, M. R., and Didyk, B. M.: Alkyl Amides and Nitriles as Novel Tracers for Biomass Burning, *Environ. Sci. Technol.*, 37, 16-21, <https://doi.org/10.1021/es020811y>, 2003.
- Song, J., Li, M., Jiang, B., Wei, S., Fan, X., and Peng, P. a.: Molecular Characterization of Water-Soluble Humic like Substances in Smoke Particles Emitted from Combustion of Biomass Materials and Coal Using Ultrahigh-Resolution Electrospray Ionization Fourier Transform Ion Cyclotron Resonance Mass Spectrometry, *Environ. Sci. Technol.*, 52, 2575-2585, <https://doi.org/10.1021/acs.est.7b06126>, 2018.
- Su, S., Xie, Q., Lang, Y., Cao, D., Xu, Y., Chen, J., Chen, S., Hu, W., Qi, Y., Pan, X.,

- Sun, Y., Wang, Z., Liu, C.-Q., Jiang, G., and Fu, P.: High Molecular Diversity of Organic Nitrogen in Urban Snow in North China, *Environ. Sci. Technol.*, **55**, 4344-4356, <https://dx.doi.org/10.1021/acs.est.0c06851>, 2021.
- Sun, W., Hu, X., Fu, Y., Zhang, G., Zhu, Y., Wang, X., Yan, C., Xue, L., Meng, H., Jiang, B., Liao, Y., Wang, X., Peng, P., and Bi, X.: Different formation pathways of nitrogen-containing organic compounds in aerosols and fog water in northern China, *Atmos. Chem. Phys.*, **24**, 6987-6999, [10.5194/acp-24-6987-2024](https://doi.org/10.5194/acp-24-6987-2024), 2024.
- Tian, L., Huang, D. D., Li, Y. J., Yan, C., Nie, W., Wang, Z., Wang, Q., Qiao, L., Zhou, M., Zhu, S., Liu, Y., Guo, Y., Qiao, X., Zheng, P., Jing, S. a., Lou, S., Wang, H., and Huang, C.: Enigma of Urban Gaseous Oxygenated Organic Molecules: Precursor Type, Role of NO<sub>x</sub>, and Degree of Oxygenation, *Environ. Sci. Technol.*, **57**, 64-75, [10.1021/acs.est.2c05047](https://doi.org/10.1021/acs.est.2c05047), 2023.
- Wang, D., Shen, Z., Yang, X., Huang, S., Luo, Y., Bai, G., and Cao, J.: Insight into the Role of NH<sub>3</sub>/NH<sub>4</sub><sup>+</sup> and NO<sub>x</sub>/NO<sub>3</sub><sup>-</sup> in the Formation of Nitrogen-Containing Brown Carbon in Chinese Megacities, *Environ. Sci. Technol.*, **58**, 4281-4290, [10.1021/acs.est.3c10374](https://doi.org/10.1021/acs.est.3c10374), 2024.
- Wang, K., Huang, R.-J., Brueggemann, M., Zhang, Y., Yang, L., Ni, H., Guo, J., Wang, M., Han, J., Bilde, M., Glasius, M., and Hoffmann, T.: Urban organic aerosol composition in eastern China differs from north to south: molecular insight from a liquid chromatography-mass spectrometry (Orbitrap) study, *Atmos. Chem. Phys.*, **21**, 9089-9104, <https://doi.org/10.5194/acp-21-9089-2021>, 2021.
- Wu, R., Vereecken, L., Tsiligiannis, E., Kang, S., Albrecht, S. R., Hantschke, L., Zhao,

- D., Novelli, A., Fuchs, H., Tillmann, R., Hohaus, T., Carlsson, P. T. M., Shenolikar, J., Bernard, F., Crowley, J. N., Fry, J. L., Brownwood, B., Thornton, J. A., Brown, S. S., Kiendler-Scharr, A., Wahner, A., Hallquist, M., and Mentel, T. F.: Molecular composition and volatility of multi-generation products formed from isoprene oxidation by nitrate radical, *Atmos. Chem. Phys.*, 21, 10799-10824, 10.5194/acp-21-10799-2021, 2021.
- Xu, L., Yang, Z., Tsona, N. T., Wang, X., George, C., and Du, L.: Anthropogenic-Biogenic Interactions at Night: Enhanced Formation of Secondary Aerosols and Particulate Nitrogen- and Sulfur-Containing Organics from beta-Pinene Oxidation, *Environ. Sci. Technol.*, 10.1021/acs.est.0c07879, 2021a.
- Xu, Y., Dong, X. N., He, C., Wu, D. S., Xiao, H. W., and Xiao, H. Y.: Mist cannon trucks can exacerbate the formation of water-soluble organic aerosol and PM<sub>2.5</sub> pollution in the road environment, *Atmos. Chem. Phys.*, 23, 6775-6788, <https://doi.org/10.5194/acp-23-6775-2023>, 2023.
- Xu, Z. N., Nie, W., Liu, Y. L., Sun, P., Huang, D. D., Yan, C., Krechmer, J., Ye, P. L., Xu, Z., Qi, X. M., Zhu, C. J., Li, Y. Y., Wang, T. Y., Wang, L., Huang, X., Tang, R. Z., Guo, S., Xiu, G. L., Fu, Q. Y., Worsnop, D., Chi, X. G., and Ding, A. J.: Multifunctional Products of Isoprene Oxidation in Polluted Atmosphere and Their Contribution to SOA, *Geophys. Res. Lett.*, 48, e2020GL089276, <https://doi.org/10.1029/2020GL089276>, 2021b.
- Yassine, M. M., Harir, M., Dabek-Zlotorzynska, E., and Schmitt-Kopplin, P.: Structural characterization of organic aerosol using Fourier transform ion cyclotron

resonance mass spectrometry: Aromaticity equivalent approach, *Rapid Commun. Mass Spectrom.*, 28, 2445-2454, <https://doi.org/10.1002/rcm.7038>, 2014.

Zhao, D., Pullinen, I., Fuchs, H., Schrade, S., Wu, R., Acir, I. H., Tillmann, R., Rohrer, F., Wildt, J., Guo, Y., Kiendler-Scharr, A., Wahner, A., Kang, S., Vereecken, L., and Mentel, T. F.: Highly oxygenated organic molecule (HOM) formation in the isoprene oxidation by NO<sub>3</sub> radical, *Atmos. Chem. Phys.*, 21, 9681-9704, [10.5194/acp-21-9681-2021](https://doi.org/10.5194/acp-21-9681-2021), 2021.

Zhong, S., Chen, S., Deng, J., Fan, Y., Zhang, Q., Xie, Q., Qi, Y., Hu, W., Wu, L., Li, X., Pavuluri, C. M., Zhu, J., Wang, X., Liu, D., Pan, X., Sun, Y., Wang, Z., Xu, Y., Tong, H., Su, H., Cheng, Y., Kawamura, K., and Fu, P.: Impact of biogenic secondary organic aerosol (SOA) loading on the molecular composition of wintertime PM<sub>2.5</sub> in urban Tianjin: an insight from Fourier transform ion cyclotron resonance mass spectrometry, *Atmos. Chem. Phys.*, 23, 2061-2077, <https://doi.org/10.5194/acp-23-2061-2023>, 2023.

Zou, C., Cao, T., Li, M., Song, J., Jiang, B., Jia, W., Li, J., Ding, X., Yu, Z., Zhang, G., and Peng, P.: Measurement report: Changes in light absorption and molecular composition of water-soluble humic-like substances during a winter haze bloom-decay process in Guangzhou, China, *Atmos. Chem. Phys.*, 23, 963-979, <https://doi.org/10.5194/acp-23-963-2023>, 2023.
